1 **The HDAC inhibitor CI-994 acts as a molecular memory aid by**  
2 **facilitating synaptic and intra-cellular communication after learning**

3 Allison M Burns<sup>1</sup>, Mélissa Farinelli-Scharly<sup>2</sup>, Sandrine Hugues-Ascery<sup>2</sup>, Jose Vicente Sanchez-  
4 Mut<sup>1,3</sup>, Giulia Santoni<sup>1</sup>, Johannes Gräff<sup>1\*</sup>

5 <sup>1</sup> EPFL, School of Life Sciences, Brain Mind Institute, Laboratory of Neuroepigenetics,  
6 Lausanne, Switzerland

7 <sup>2</sup> E-PHY-SCIENCE electrophysiology platform, Biot, France

8 <sup>3</sup> Current address: Instituto de Neurociencias de Alicante, Molecular Neurobiology and  
9 Neuropathology, Alicante, Spain

10 \* Corresponding Author

11 **Email:** [johannes.graeff@epfl.ch](mailto:johannes.graeff@epfl.ch)

12

13 **Author Contributions:** AMB, JVS-M and JG conceptualized the project; AMB, MFS, SHA, JVS-  
14 M and GS performed animal experiments; MFS and SHA performed electrophysiological  
15 experiments; AMB performed molecular experiments and analyzed data; AMB and JG wrote the  
16 paper.

17 **Competing Interest Statement:** Johannes Gräff is co-author of a patent (12/917,402) for using  
18 CI-994 for the treatment of cognitive disorders

19 **Classification:** Biological Sciences/Neurosciences

20 **Keywords (3-5):** Neuroepigenetics, contextual fear conditioning, HDACi, next-generation  
21 sequencing

22 **This PDF file includes:**

23 Main Text

24 Figures 1 to 5

25 Supplemental Figures 1 to 14

26 Tables 1 to 7 are included as excel files with submission

27

28 **Abstract**

29 Long-term memory formation relies on synaptic plasticity, activity-dependent transcription and  
30 epigenetic modifications. Multiple studies have shown that HDAC inhibitor (HDACi) treatments  
31 can enhance individual aspects of these processes, and thereby act as putative cognitive  
32 enhancers. However, their mode of action is not fully understood. In particular, it is unclear how  
33 systemic application of HDACis, which are devoid of substrate specificity, can target pathways  
34 that promote memory formation. In this study, we explore the electrophysiological, transcriptional  
35 and epigenetic responses that are induced by CI-994, a class I HDAC inhibitor, combined with  
36 contextual fear conditioning (CFC) in mice. We show that CI-994-mediated improvement of  
37 memory formation is accompanied by enhanced long-term potentiation in the hippocampus, a  
38 brain region recruited by CFC, but not in the striatum, a brain region not primarily implicated in  
39 contextual memory formation. Furthermore, using a combination of bulk and single cell RNA  
40 sequencing, we find that synaptic plasticity-promoting gene expression cascades are more  
41 strongly engaged in the hippocampus than in the striatum, but only when HDACi treatment co-  
42 occurred with CFC, and not by either treatment alone. Lastly, using ChIP-sequencing, we show  
43 that the combined action of HDACi application and conditioning is required to elicit enhancer  
44 histone acetylation in pathways that may underlie improved memory performance. Together, our  
45 results indicate that systemic HDACi administration amplifies brain-region specific processes that  
46 are naturally induced by learning. These findings shed light onto the mode of action of HDACis  
47 as cognitive enhancers.

48

49 **Significance Statement**

50 Memory formation relies on a plethora of functions, including epigenetic modifications. Over the  
51 past years, multiple studies have indicated the potential of HDAC inhibitors (HDACi) to act as  
52 cognitive enhancers, but their mode of action is not fully understood. Here, we tested whether  
53 HDACi treatment improves memory formation via “cognitive epigenetic priming”, stipulating that  
54 HDACis – without inherent target specificity – specifically enhance plasticity-related processes.  
55 We found that combining HDACi with fear learning, but not either treatment alone, enhances  
56 synaptic plasticity as well as memory-promoting transcriptional signaling in the hippocampus, a

57 brain area known to be recruited by fear learning, but not in others. These results lend  
58 experimental support to the theory of “cognitive epigenetic priming”.

59

## 60 **Introduction**

61 Long-term memory is a product of synaptic communication as well as activity-dependent  
62 transcription that is regulated by epigenetic signaling (1–5). For example, memory forming tasks,  
63 such as contextual fear conditioning (CFC), are paralleled by gene expression and histone  
64 acetylation changes in the hippocampus (6–8), while impaired cognition, as seen in Alzheimer’s  
65 Disease and age-related cognitive decline, is coupled with a reduction in hippocampal histone  
66 acetylation and plasticity-related gene expression (9–13). Some of these epigenetic and  
67 transcriptional changes can be augmented by systemic HDAC inhibitor (HDACi) treatment, which  
68 improves memory in both healthy and cognitively impaired mice (10–12, 14, 15). Although the  
69 use of HDACis in these studies testifies to their suitability as pharmacological memory aids, the  
70 mechanisms by which HDACi enhances memory are not fully understood. In particular, it is  
71 unclear how systemic application of HDACis, most of which are devoid of substrate specificity *per*  
72 *se*, can target pathways that promote memory formation.

73 One proposed theoretical mode of action for HDACis as cognitive enhancers is called “cognitive  
74 epigenetic priming” (3, 16). This model is inspired by evidence from cancer research, where  
75 several HDACis have been shown to improve target efficacy of anti-cancer treatments (17, 18),  
76 and from addiction research, where chronic drug abuse was found to durably enrich histone  
77 acetylation, which relaxes the chromatin structure into a primed state and thereby lowers the  
78 activation threshold for gene expression changes during subsequent drug exposures (19, 20).  
79 Analogously, for cognition, this theory stipulates that by broadly increasing histone acetylation,  
80 HDACi treatment leads to an overall primed state. Memory-induced neuronal activity, which is  
81 inherently characterized by a high degree of target specificity (2), would then further enrich  
82 HDACi-induced histone acetylation and recruit the transcriptional machinery specifically to  
83 synaptic plasticity-related genes.

84 In this study, we tested the concept of “cognitive epigenetic priming” in mice on three different  
85 levels. First, we investigated whether systemic HDACi treatment elicits brain-region specific  
86 electrophysiological and transcriptional responses after contextual fear conditioning, a  
87 hippocampus-dependent memory task. Second, we assessed whether and to which extent  
88 specific cell types are affected by the HDACi treatment in combination with learning using single  
89 nuclear RNA-sequencing (snRNA-seq) of the hippocampus; and third, we determined which gene



90 loci are epigenetically regulated by HDACi treatment using chromatin immunoprecipitation (ChIP)  
91 followed by sequencing. These experiments were designed to better understand the underlying  
92 mechanisms of HDACis as potential cognitive enhancers.

93

## 94 **Results**

### 95 **Systemic HDACi treatment enhances memory consolidation after subthreshold contextual** 96 **fear conditioning**

97 To investigate the mechanisms by which systemic HDACi treatment enhances fear memory, we  
98 treated mice with the HDACi CI-994, before subjecting them to a subthreshold contextual fear  
99 conditioning (CFC) task, a modified Pavlovian conditioning paradigm that, alone, does not induce  
100 memory formation (21). CI-994 is a class I HDACi that selectively impedes HDACs 1-3 (22),  
101 promotes functional recovery after stroke (23), and that has shown promise against cognitive  
102 dysfunctions in preclinical animal models (15, 24, 25). When i.p. injected it crosses the blood-  
103 brain-barrier and remains in the brain at concentrations greater than 1000nm for up to 5 hours  
104 (15). One hour prior to CFC or Context only exposure (Context), mice were interperitoneally (i.p.)  
105 injected with 30mg/kg of CI-994 or its vehicle (VEH) (**Fig. 1A**). One day later, freezing was  
106 measured during a 3 min context exposure. We found that pairing the subthreshold CFC paradigm  
107 with the HDACi significantly improved memory retention ( $P = 0.0002$ ) compared to the CFC  
108 paradigm alone ( $P = 0.172$ ), and compared to HDACi treatment alone ( $P = 0.997$ , Tukey's HSD  
109 test following one-way ANOVA,  $F_{(3,39)} = 10.16$ ,  $P = 4.44e-05$ ) (**Fig. 1B**). There were no freezing  
110 differences between context and CFC exposure for VEH-treated animals ( $P = 0.172$ ).  
111 Furthermore, HDACi treatment had no effect on speed ( $F_{(3,39)} = 1.71$ ,  $P = 0.18$ ) or distance  
112 travelled ( $F_{(3,39)} = 1.69$ ,  $P = 0.184$ ) and did not affect anxiety levels as measured by an open field  
113 test at the time of initial encoding ( $F_{(3,39)} = 0.536$ ,  $P = 0.66$ ) (**Supplemental Fig. 1**). These results  
114 indicate that the HDACi treatment can elevate an otherwise inefficient learning paradigm above  
115 threshold and lead to long-term memory retention.

116

### 117 **Systemic HDACi treatment regulates long term potentiation in an activity-specific manner**

118 To explore whether HDACi treatment improves memory via cognitive epigenetic priming, we first  
119 assessed its mode of action on synaptic plasticity. To this end, we measured the effects of HDACi  
120 on long term potentiation (LTP) in the hippocampus, a brain region activated by CFC (26), and  
121 the striatum, a brain region that is not directly involved in contextual memory formation (27) one  
122 hour after CFC. We found a significant increase in LTP at perforant path synapses of the dentate  
123 gyrus (DG) of the hippocampus when CFC was paired with the HDACi treatment (**Fig. 1C**; one-  
124 way ANOVA,  $F_{(3,28)} = 10.57$ ,  $P = 8.09e-05$ ). Without CFC, the HDACi had no effect on LTP;  
125 similarly, CFC alone did not facilitate LTP. Conversely, at cortico-striatal fibers, the HDACi  
126 treatment had no effect regardless of the behavioral paradigm ( $F_{(3,28)} = 0.234$ ,  $p = 0.872$ ) (**Fig.**  
127 **1D**). Neither paired pulse facilitation (PPF) nor input/output (I/O) relationships were changed in  
128 either brain region (**Supplemental Fig. 2A-D**). Importantly, combining CFC with HDACi also  
129 enhanced LTP at Schaffer collaterals of the CA1, another hippocampal subregion (one-way  
130 ANOVA,  $F_{(3,28)} = 5.213$ ,  $P = 0.005$ ) both after sub-threshold CFC (**Supplemental Fig. 3**), and  
131 when using a stronger CFC paradigm (one-way ANOVA,  $F_{(3,33)} = 3.663$ ,  $P = 0.0221$ )  
132 (**Supplemental Fig. 4**).

133 These findings indicate a brain area-specific effect of the HDACi treatment, with only brain areas  
134 engaged by CFC displaying enhanced synaptic plasticity. Interestingly, this brain region-specific  
135 effect on synaptic plasticity occurred in spite of the same degree of HDAC activity inhibition in  
136 both brain regions. HDAC activity was reduced by about 50% in both the hippocampus ( $F_{(1,24)} =$   
137  $60.15$ ,  $p = 5.44e-08$ ) (**Fig. 1E**) and the striatum ( $F_{(1,24)} = 68.96$ ,  $p = 1.62e-08$ ) (**Fig. 1F**) in response  
138 to HDACi, with no difference in HDAC activity induced by learning itself. Thus, despite the same  
139 extent of HDAC inhibition induced by the HDACi, synaptic plasticity was only altered in the brain  
140 area directly engaged by CFC.

141 To confirm these findings in a different task, and to show that the HDACi does not only improve  
142 plasticity and performance in a hippocampus-specific manner, we also tested HDACi treatment  
143 during rotarod training, a motor skill learning task known to depend on the cortico-striatal pathway  
144 (28). Animals were i.p. injected with HDACi or VEH one hour before training (**Supplemental Fig.**  
145 **5A**). We found that HDACi-treated animals were able to stay on the apparatus for longer than  
146 their VEH-treated counterparts (one-way ANOVA,  $F_{(1,120)} = 12.155$ ,  $p = 0.0007$ ) (**Supplemental**  
147 **Fig. 5B**), indicating improved motor learning. While neither training nor HDACi had any effect on

148 hippocampal or striatal LTP (**Supplemental Fig. 5C-D**), we found that HDACi paired with rotarod  
149 training selectively increased striatal PPF (two-way ANOVA,  $F_{(3,192)} = 12.217$ ,  $P = 2.37e-07$ )  
150 (**Supplemental Fig. 5E-F**), which is known to underlie motor learning in the striatum (29). In  
151 addition, there were no major differences in I/O in the striatum or the hippocampus  
152 (**Supplemental Fig. 5G-H**). These electrophysiological data are thus in support of the cognitive  
153 epigenetic priming hypothesis at the level of these two brain areas, insofar as the HDACi  
154 application *per se* did not yield any measurable difference, but necessitated task-specific neuronal  
155 activity to reveal its potentiating effect.

156

### 157 **HDACi activates different transcriptional cascades in response to CFC in the hippocampus** 158 **and striatum**

159 To further understand the molecular mechanisms by which epigenetic priming leads to improved  
160 memory performance, we used bulk RNA-sequencing in the hippocampus and striatum to  
161 determine which genes are activated when CFC is combined with HDACi treatment. For this, we  
162 extracted and sequenced total mRNA from whole-tissue homogenates one hour after CFC or  
163 context only exposure, using the same experimental setup as for the electrophysiological  
164 recordings (**Fig. 1A**). The Illumina HiSeq4000 was used to generate four replicate libraries for  
165 each group with a minimum of 28M uniquely mapping paired reads per sample (**Supplemental**  
166 **Fig. 6A**). In total, 26,020 genes were expressed by greater than 1 count per million (CPM) in at  
167 least 4 of the libraries. Principal component analysis for the top 1000 most variable genes across  
168 all libraries revealed that 93% of the variance results from inter-brain region differences  
169 (**Supplemental Fig. 6B, C**).

170 In the hippocampus, consistent with previous data (30), we found no differentially expressed  
171 genes (DEGs) ( $P \leq 0.05$ ;  $|\log_2FC| \geq 0.4$ ) between CFC and context only exposure in VEH-treated  
172 animals (**Fig. 2A, left panel**). Likewise, when comparing CFC with the context-only group in  
173 HDACi-treated animals, no DEGs were detected, indicating that subthreshold CFC alone is not  
174 sufficient to induce detectable transcriptional changes(**Fig. 2A, middle left panel**). Conversely,  
175 when context exposure was paired with CI-994, we found 1002 and 1679 genes significantly up-  
176 and downregulated, respectively, indicating that the addition of the HDACi alone alters the

177 transcriptional landscape (**Fig. 2A, middle right panel**). When HDACi-CFC was compared to  
178 VEH-CFC, we detected 1336 up-regulated genes, a 25% increase when compared to the context  
179 only contrast, but a similar number (1608) of downregulated genes (**Fig. 2A, right panel**).

180 In the striatum, there were no DEGs between the CFC and context only exposure in either the  
181 VEH or HDACi treated animals (**Fig. 2B, left panels**). Similar to the hippocampus, when HDACi-  
182 Context was compared to VEH-Context, 1486 and 1968 genes were significantly up- and  
183 downregulated (**Fig. 2B, middle right panel**). In contrast to the hippocampus, however, no further  
184 increase in the number of DEGs was detected when HDACi was paired with CFC (1389 genes  
185 were upregulated, and 1974 genes were downregulated) (**Fig. 2B, right panel**). Lists of pair-wise  
186 differential expression for both the hippocampus and striatum can be found in **Supplemental**  
187 **Table 1**.

188 When focusing on strongly up-regulated genes ( $P \leq 0.05$ ,  $\log_2FC \geq 3$ ), we detected 4.5x more  
189 genes in the hippocampus than in the striatum (**Fig. 2C**). Furthermore, these genes were more  
190 strongly activated in the hippocampus than in the striatum (Student's t-test of slope values,  $P =$   
191  $2.304e-05$ ) (**Fig. 2C**). The strongly upregulated hippocampal genes (**Supplemental Table 2**)  
192 were enriched in ion-transport ontologies and included transthyretin, *Ttr*, which has been shown  
193 to provide neuroprotection in aged mice and to be associated with enhanced memory (31, 32),  
194 and synaptotagmin 13 (*Syt13*), a gene previously shown to be up-regulated after CFC (33). In  
195 contrast, the striatal genes were primarily predicted genes (**Supplemental Table 2**) and GO  
196 analysis did not yield any enriched pathways. This indicates that in the hippocampus, the  
197 expression of these genes is further enhanced when the HDACi is paired with CFC, while pairing  
198 HDACi with CFC had no such effect in the striatum.

199 Next, we set out to identify transcriptional patterns by selecting genes that were differentially  
200 expressed ( $P \leq 0.05$ ,  $\log_2FC \geq 0.4$ ) when compared to the baseline group (VEH-Context). For  
201 this, all DEGs underwent decision tree clustering as described in the materials and methods.  
202 Considering that we aim to specifically understand the targets of epigenetic priming, we focused  
203 on genes that are up-regulated by HDACi treatment in our analyses, however the other clusters,  
204 including down-regulated ones, as well as their associated genes, can be found in **Supplemental**  
205 **Fig. 7** and **Supplemental Table 3**. Four major clusters were identified as trajectories of interest  
206 (**Fig. 2D**). In the hippocampus, we found 1) 62 genes that were up-regulated by the HDACi

207 treatment alone (i.e., in the HDACi-VEH group) and further increased when HDACi was paired  
208 with CFC (i.e, the HDACi-CFC group), which we termed *primed-active*; 2) 937 genes that were  
209 increased by HDACi treatment but showed no further CFC-driven increase, which we termed  
210 *primed-stable*; 3) 579 genes that were enriched by HDACi treatment, but were reduced when the  
211 HDACi was paired with CFC, which we termed *primed-silenced*; 4) and 726 genes that were only  
212 activated when combining HDACi with CFC, but not by either condition alone, which we termed  
213 *non-primed active* (**Fig. 2D**). In the striatum, the order of magnitude of DEGs was similar (**Fig.**  
214 **2F**). There were 120 genes in the *primed-active* cluster, 1068 genes in the *primed-stable* cluster,  
215 981 genes in the *primed-silenced* cluster and 811 genes in the *non-primed active cluster* (**Fig.**  
216 **2F**).

217 We next performed a Gene Ontology (GO) analysis (**Fig. 2E**) to identify enriched pathways in  
218 each cluster in both the hippocampus and the striatum. In the hippocampus, the *primed-active*  
219 cluster was enriched for the Erk1 and Erk2 cascade, which has been implicated in synaptic  
220 plasticity as well as learning and memory (34, 35). This cluster included cytokine genes, such as  
221 *Ccl6* (**Fig. 2D**), which is involved in the p38-MAPK pathway (36, 37) and which plays a role in cell  
222 survival (38). Conversely, in the striatum, the *primed-active* cluster was not enriched for any  
223 ontologies involved in MAPK/ERK signaling or learning and memory.

224 Furthermore, the *primed-stable* cluster was characterized by learning and memory-related  
225 pathways such as cognition and regulation of calcium ion transport in the hippocampus, but not  
226 the striatum (**Fig. 2E**). Hippocampal DEGs in this cluster included brain derived neurotrophic  
227 factor (*Bdnf*) and the proto-oncogene Jun (*Jun*), both immediate early genes (IEGs) induced by  
228 neuronal activity and implicated in synaptic plasticity as well as learning and memory. *Bdnf* plays  
229 a critical role in hippocampal CFC (39) and enhances synaptic strength at the Schaffer collateral-  
230 CA1 synapses (40), while *Jun* is a member of the AP-1 transcriptional activator complex, which  
231 binds enhancers and regulates chromatin opening during CFC (41, 42). In the striatum, this  
232 cluster did not include memory-related IEGs. It did, however, contain pathways involved in  
233 intracellular signal transduction that also regulate learning and memory (6, 43) such as the “MAPK  
234 cascade”, “Ras protein signal transduction” and “Erk1 and Erk2 cascade”. This comparison  
235 stipulates that HDACi similarly primes the MAPK pathway in both the hippocampus and the  
236 striatum but further potentiates only the *primed-active* genes in the hippocampus.

237 In the *primed-silenced* or *non-primed active* states, no ontologies associated with synaptic signal  
238 transduction were found (**Fig. 2E**). Finally, the hippocampal *non-primed active* cluster,  
239 represented by genes that are only transcribed after combined HDACi-CFC, is enriched for “metal  
240 ion transport” and “ion transmembrane transport” pathways, while in the striatum, it is enriched  
241 for genes involved in a “negative response to stimulus”. This could indicate that the combination  
242 of HDACi treatment and CFC increases inhibitory signalling in the striatum, possibly related to the  
243 decreased motor response following conditioning. Of note, none of the clusters in which HDACi  
244 reduced transcription included pathways that are involved in learning and memory or synaptic  
245 plasticity in either the hippocampus or the striatum. Taken together, these results illustrate that  
246 HDACi treatment, and not CFC, is the major driver of differential transcription between the  
247 hippocampus and the striatum. It enhances the Mapk/Erk signalling pathway in both the  
248 hippocampus and the striatum as seen in the comparisons of the *primed-stable* groups, but is  
249 able to further induce learning-specific genes in the *primed-active* state in the hippocampus when  
250 paired with CFC, but not the striatum.

251

## 252 **HDACi activates different transcriptional cascades across cell types within the** 253 **hippocampus**

254 Next, we aimed to understand which cell types within the hippocampus are most responsive to  
255 HDACi treatment. To do so, we used snRNA-seq on isolated hippocampi from animals that were  
256 treated with either HDACi or VEH one hour before undergoing CFC. Since transcriptional  
257 differences were most prominent in the HDACi-CFC versus the VEH-CFC groups (**Fig. 2C**), we  
258 focused on only this comparison. We performed dimensionality reduction using uniform manifold  
259 approximation and projection (UMAP) and clustered nuclei by the k-nearest neighbors. We  
260 removed clusters containing fewer than 50 nuclei, revealing 30 distinct clusters consisting of  
261 15,339 total nuclei and expressing a total of 24,271 genes (**Supplemental Fig. 8A**). These  
262 clusters were then assigned to known cell types by comparing expression of cell-type specific  
263 genes taken from previously published snRNA-seq datasets (44–47) and the Allen Brain Atlas  
264 (48) (**Supplemental Fig. 8B**). This analysis identified 10 distinct cell types: 4 clusters of excitatory  
265 neurons that split based on location within the hippocampus (5175 DG nuclei, 2871 CA1 nuclei,  
266 1657 CA3 nuclei, and 507 nuclei with no location marker); 1 cluster of 794 inhibitory neurons; 4



267 glial clusters (1960 Oligodendrocytes, 254 oligo-precursors, 763 astrocytes and 880 microglia);  
268 and a final cluster of 478 nuclei (NA) which could not be assigned to a single cell type based on  
269 its expression profile (**Fig. 3A and Supplemental Fig. 8C**). In line with previous work (49),  
270 neuronal clusters had more expressed genes than glial clusters (**Supplemental Fig. 8D**) and the  
271 proportions of cell types were similar to those reported for the hippocampal region in the Blue  
272 Brain Atlas (50) (**Supplemental Fig. 8E**).

273 We then explored whether pairing CFC with HDACi induces distinct responses across cell types.  
274 Augur, a tool that prioritizes a population's responsiveness to an experimental perturbation (51),  
275 reported a similar global responsiveness for all clusters (**Supplemental Fig. 9A**), and with the  
276 exception of oligo-precursors, HDACi treatment did not significantly change cell type composition  
277 within clusters (**Supplemental Fig. 9B**). However, HDACi treatment differentially regulated a  
278 distinct set of genes in each cell type, with excitatory neurons having the largest HDACi response  
279 (**Fig. 3B, Supplemental Fig. 9C and Supplemental Table 4**). These DEGs were highly cluster  
280 specific: We found that excitatory neurons of the DG share 36% and 24% of their up-regulated  
281 DEGs with excitatory neurons of the CA1 and CA3, respectively, and fewer than 15% with each  
282 of the other cell types (**Fig. 3C, left panel**). This low overlap of HDACi induced up-regulation was  
283 also seen in other cell types (**Fig. 3C and Supplemental Fig. 9D**). Among excitatory neurons,  
284 45%, 38% and 27% of genes were uniquely up-regulated in the DG, CA1 and CA3, respectively,  
285 while among glial cells, 68%, 53% and 47% were uniquely upregulated among microglia,  
286 astrocytes and oligodendrocytes, respectively (**Supplemental Fig. 9E**). Down-regulated genes  
287 also appeared to be cluster specific, although to a lower magnitude than the up-regulated genes  
288 (**Supplemental Fig. 9F**).

289 Interestingly, we found an HDACi-specific separation for excitatory neurons in the DG and for glia,  
290 but not for any other cluster (**Fig. 3D**). This split was mainly mediated by the upregulated genes  
291 within the DG, as removing those genes and re-running the dimension reduction re-merged the  
292 split DG cluster (**Fig. 3E**). Conversely, there was no cluster re-merging when removing up-  
293 regulated DEGs from CA1, glia or from any other cell type (**Fig. 3F and Supplemental Fig. 10A**).  
294 Furthermore, DG cluster re-merging was specific to the up-regulated genes, as removing only  
295 downregulated genes had no effect (**Supplemental Fig. 10B**). Together, these results provide  
296 supporting evidence that pairing CFC with HDACi treatment transcriptionally activates different

297 gene sets across cell types, with a particularly strong response among upregulated genes in the  
298 DG. For this reason, we continued our analysis of epigenetic priming by focusing on excitatory  
299 neurons of the DG.

300

301 **HDACi combined with CFC enriches H3K27ac at genes involved in synaptic**  
302 **communication.**

303 Given the strong up-regulation of genes involved in excitatory neurons of the DG, we  
304 characterized histone acetylation in this region by chromatin immunoprecipitation followed by  
305 sequencing (ChIP-Seq). We focused on H3K27ac, a known marker of active enhancers that is  
306 enriched at activity-dependent regulatory elements after neuronal activation (30, 42, 52–54),  
307 correlates with gene transcription (30, 55) and often co-occurs with H3K9ac, a marker of active  
308 promoters (56). Furthermore, in line with previous studies (15, 25, 57, 58), we found that HDACi  
309 treatment increased global H3K27ac, alongside H3K9ac and H4K12ac as revealed by western  
310 blotting (Two-way ANOVA,  $F_{(3,60)} = 22.47$ ,  $P = 1.11e-13$ ) (**Supplemental Fig. 11**). For ChIP-seq,  
311 we had 3 replicates, each from the pooled DG from 5 mice and sorted NeuN+ nuclei by  
312 fluorescence activated nuclear sorting (FANS) (**Fig. 4A**). Libraries for the H3K27ac-  
313 immunoprecipitated samples were prepared and processed as described in the materials and  
314 methods.

315 Differential enrichment analysis (Diffbind, DEseq2, data in **Supplemental Table 5**) revealed that  
316 CFC in VEH-treated animals led to only marginal changes in H3K27ac enrichment (**Fig. 4B**), in  
317 line with the transcriptional data (**Fig. 2A**). Conversely, when CFC occurred in the presence of  
318 the HDACi, more than 10,000 and 15,000 regions were significantly down and up-regulated,  
319 respectively, indicating that in the presence of HDACi, the behavioral paradigm *per se* can trigger  
320 substantial epigenetic changes. Furthermore, the HDACi treatment itself also enriched a  
321 significant number of regions – approximately 10,500 regions in both context and CFC treated  
322 groups (**Fig. 4B, right plots**) – suggesting that both CFC and HDACi treatment alter H3K27ac  
323 enrichment. This data is in contrast with the transcriptional results, in which only HDACi treatment,  
324 and not the behavioral condition alone, induced transcriptional changes. In addition, while there



325 was equal down and up-regulation of transcription after HDACi treatment (**Fig. 2A, right plots**),  
326 we see a higher amount of H3K27ac accumulation after HDACi (**Fig. 4, right plots**).

327 In order to determine the chromatin state and the corresponding gene for each H3K27ac peak,  
328 we used ChromHMM (59) on previously published histone post-translational modifications  
329 (PTMs) from bulk hippocampal tissue collected after CFC (30). The entire mouse genome was  
330 assigned to one of five chromatin states: Control regions; repressed regions; promoter regions;  
331 poised enhancers; and active enhancers (**Supplemental Fig. 12A**). We calculated the state  
332 overlap for each peak and assigned the peak to the state that covered the highest proportion  
333 (**Supplemental Fig. 12B**). Doing so, 70.5% of bases assigned as active enhancers in  
334 ChromHMM were enriched for H3K27ac in our dataset; 44% and 34.9% of bases assigned as  
335 poised enhancers promoters, respectively, were also enriched for H3K27ac, while only 2.8% and  
336 2.9% of control regions and repressed regions had H3K27ac peaks (**Supplemental Fig. 12C**).

337 Next, we performed a decision tree analysis for each chromatin state, focusing on the same four  
338 trajectories as before: *primed-active*, *primed-stable*, *primed-silenced* and *non-primed active* (**Fig.**  
339 **2D-F**). Since active enhancers contained the largest number of peaks (**Fig. 4C**), we chose to  
340 analyze this subset of peaks in depth (**Fig. 4D**), but other chromatin states are included in  
341 **Supplemental Figure 13**. The *primed-active* cluster for active enhancers was the smallest,  
342 containing 179 peaks (**Fig. 4D**). This cluster represented ontologies associated with dendritic  
343 locations in the cell (**Fig. 4E**) and included peaks associated with NMDA receptor 2A (*Grin2a*)  
344 and Calcium Voltage-Gated Channel Subunit (*Cacna1e*). In the *primed-stable* cluster, there were  
345 378 active enhancers for which H3K27ac was increased after HDACi treatment but not further  
346 enriched after CFC (**Fig. 4D**). This cluster included ontologies specific to synaptic locations, and  
347 a previously described enhancer of *cFos*, whose regulation by histone acetylation was recently  
348 validated by targeted dCas9-p300 manipulations (53). The 1480 enhancers of the *primed-*  
349 *silenced* cluster were also associated with genes that are involved in synaptic assembly and  
350 signaling, although noticeably fewer enhancers were associated with IEGs (**Supplemental Table**  
351 **6**). Finally, the *non-primed active* cluster was the largest and contained 6493 active enhancer  
352 peaks, the ontologies for which were also associated with regulation of synaptic signaling. This  
353 cluster included enhancers for many genes that are specific for memory and synaptic plasticity.  
354 For example, *Fosb*, *Jun*, *Junb* and *JunD*, which are members of the AP-1 complex, known to be

355 involved in neuronal plasticity processes during CFC (41, 42); calcium dependent protein kinases,  
356 which are crucial for signaling at glutamatergic synapses (60); and genes in the MAPK/ERK  
357 signaling cascade, which regulates H3 acetylation during CFC and helps to establish the  
358 stabilization of long-term memory (6, 35, 43).

359 Taken together, these data show that HDACi-induced H3K27ac enrichment after context or CFC  
360 is highly specific to neuronal signaling processes. However, in contrast to the RNA-seq data, the  
361 H3K27ac enrichments appear to be most relevant in the *non-primed active* cluster, indicating that  
362 it is most responsive to combined HDACi and CFC treatment, which closely resembles the  
363 behavioral and electrophysiological results. This is interesting insofar as we would expect  
364 changes in acetylation, or our priming step, to be relevant in all HDACi treated groups, but  
365 transcriptional activation to be more specific to the paired HDACi and CFC experiments. Thus, to  
366 better understand this disconnect between transcriptional activation and acetylation enrichment,  
367 we lastly directly compared which genes are both enriched and activated and which genes are  
368 only enriched for H3K27ac at enhancer regions.

369

370 **Transcriptional activation and H3K27ac accumulation occur at genes involved in synaptic**  
371 **communication.**

372 To better understand the relationship between HDACi-induced epigenetic changes and  
373 transcriptional activation after CFC, we related H3K27ac accumulation at active enhancers to the  
374 expression changes of their associated genes. Doing so, we found that multiple genes underwent  
375 a change in their trajectory (**Fig. 5A, B**). The most pronounced trajectory change occurred for  
376 genes associated with active enhancers that were in the *non-primed active* cluster in the ChIP  
377 dataset, of which 58% changed to being transcriptionally activated by HDACi regardless of  
378 whether CFC had occurred or not (*primed-stable*). This indicates that, while CFC was needed to  
379 drive their acetylation changes, CFC was no longer required for their transcription changes. These  
380 genes were enriched for ontologies including “positive regulation of signal transduction” and  
381 “nervous system development” (**Fig. 5C**), whereas ontology analysis for genes that switched  
382 between other clusters did not yield any significant hits. Genes in this group included several  
383 voltage-gated potassium channels such as *Kcna1*, the transcription factor *Neurod2*, which is

384 crucial for fear learning (61), as well as the IEG and AP-1 complex member, *Jun* (**Fig. 5D**). In  
385 addition, the *non-primed active* enhancer to *primed-stable* transcriptional cluster switch was  
386 enriched for various genes belonging to the MAPK signaling pathway such as *Mapk4*, *Jun* and  
387 *Rapgef2* (**Fig. 5E and Supplemental Tables 3 and 6**).

388 When comparing H3K27ac enrichment to the transcriptional activation in single nuclei of the DG  
389 after combined HDACi-CFC (**Supplemental Fig. 14A**), we found that only 199 of the 4594 genes  
390 were up-regulated in both analyses after combined HDACi-CFC treatment (**Supplemental Fig.**  
391 **14B**). Despite this being a small subset of the total number of genes, which is likely due to  
392 technical differences between the bulk and single nuclei preparations, these genes were relevant  
393 to learning and memory in that they included NMDA receptors (*Grin2a* and *Grin2b*), a calcium  
394 voltage gated ion channel (*Cacna1e*) and again, members of the MAPK pathway including  
395 *Mapk10* and Ras-guanine-nucleotide releasing factor 1 (*Rasgrf-1*) (**Fig. 5E**), all of which contribute  
396 to glutamatergic synapse communication.

397 Lastly, when comparing all three datasets together, namely enhancer acetylation, bulk and  
398 snRNA-seq transcriptional changes, the MAPK pathway emerged as being predominantly  
399 activated (**Fig. 5E**). ERK-mediated MAPK pathway is necessary for memory consolidation (62,  
400 63) and, once activated, ERK phosphorylates protein targets that are implicated in gene  
401 transcription, protein synthesis and synaptic plasticity (35), as well as histone acetylation (6). In  
402 addition to the MAPK-pathway, 18 genes were increased after combined HDACi-CFC in both the  
403 snRNA-seq and bulk-seq and had increased enhancer H3K27ac (**Supplemental Table 7**).  
404 Interestingly, two of these genes, autism susceptibility candidate 2 (*Auts2*) and cortactin binding  
405 protein 2 (*Cttnbp2*) protect against autism like behavior and impaired object recognition memory  
406 (64, 65), while the rest did not seem related to synaptic signaling. Taken together these data  
407 suggest that genes involved in synaptic communication and MAPK pathway signaling are  
408 epigenetically and transcriptionally activated by HDACi, which suggests these pathways to  
409 underlie HDACi-mediated memory enhancement.

410

## 411 **Discussion**

412 In this study, we aimed to determine the mechanisms by which HDACi application facilitates  
413 memory formation, and thereby to assess the concept of “cognitive epigenetic priming”. We found  
414 that the HDACi CI-994 improves behavioral responses to a subthreshold CFC paradigm (**Fig. 1B**)  
415 and following rotarod training (**Supplemental Fig. 5B**), regulated by the hippocampus and  
416 striatum respectively. In both behavioral paradigms, CI-994 selectively enhanced unique aspects  
417 of synaptic communication within each brain region (**Fig. 1C** and **Supplemental Fig. 5F**) despite  
418 these brain areas showing comparably reduced HDAC activity (**Fig. 1E-F**). At the molecular level,  
419 HDACi treatment transcriptionally activated distinct gene subsets in each brain region (**Fig. 2**)  
420 and between different cell types within the hippocampus (**Fig. 3**). Finally, in DG neurons, HDACi  
421 treatment enriched H3K27ac at the enhancers of genes associated with synaptic function (**Fig.**  
422 **4**), particularly at those involved in MAPK signaling (**Fig. 5**). Together, these findings indicate that  
423 CI-994 – although applied systemically – results in brain region, cell type and pathway-specific  
424 effects.

425  
426 As these effects were predominantly observed when HDACi treatment was combined with CFC,  
427 but not by either paradigm alone, they support the notion that CI-994 at least partly acts via  
428 “cognitive epigenetic priming” (3, 16). This model has been inspired by evidence from cancer  
429 research, where HDACi application – inherently devoid of target specificity – improves the efficacy  
430 of ongoing cancer treatments, while *per se* having no beneficial effects (17, 18). Analogously,  
431 here, we found the HDACi application itself to have minimal effects; but when applied jointly with  
432 subthreshold CFC, the HDACi treatment elicited electrophysiological, transcriptional and  
433 epigenetic changes that paralleled the improved memory performance.

434  
435 The brain region-specific electrophysiological effects likely occur because the HDACi treatment  
436 reinforces behaviorally relevant cellular pathways per brain area. When paired with CFC, HDACi  
437 specifically enhances hippocampal LTP, which is known to underlie contextual fear learning (66–  
438 69); whereas when paired with rotarod training, HDACi enhances cortico-striatal PPF, which is  
439 known to underlie motor learning (29, 70, 71). This specialization is further supported by the  
440 differential transcriptional programs activated in the hippocampus and striatum. While HDACi  
441 addition enriched the MAPK pathway in both brain regions irrespective of whether the animals

442 were fear conditioned or only context exposed, the learning and memory-related ERK1 and ERK2  
443 cascade as well as *Bdnf* and *Jun*, which are both involved in MAPK/ERK signaling pathway (34,  
444 53, 72, 73), were only enriched in the hippocampus in combination with contextual learning. This  
445 suggests that HDACi generally targets the MAPK pathway but that, when paired with CFC, it leads  
446 to a further transcriptional enhancement thereof.

447

448 At the epigenetic level, we found a matching correlation between improved contextual memory  
449 formation, hippocampal LTP and enhancer H3K27ac enrichment when HDACi treatment was  
450 paired with CFC (**Fig. 4**). But even after HDACi treatment alone, we observed H3K27ac-enriched  
451 pathways to be mainly associated with synaptic functions. Interestingly, past results have  
452 indicated that either HDACi (74) or CFC alone (30) enrich histone acetylation at regions that were  
453 already acetylated in baseline conditions. This suggests that the HDACi – although broadly  
454 inhibiting HDAC activity – acts by reinforcing acetylated regions, which is likely, given that HDACs  
455 are known to be predominantly recruited to and act upon previously activated chromatin regions  
456 (75). Furthermore, H3K27ac enrichment also occurred at enhancers of the MAPK pathway (**Fig.**  
457 **5**), which expands on previous findings linking HDACi treatment to this pathway (6, 76), and  
458 testifies to the importance of H3K27ac-induced epigenetic priming for improved memory  
459 performance.

460

461 At the same time, we observed that H3K27ac changes were not always translated into  
462 transcriptional changes (**Fig. 5**), which indicates such gene activation to be independent of  
463 H3K27ac priming at this time post-learning. This observation bears striking resemblance to a  
464 recent study which described an initial increase in engram enhancer accessibility following CFC,  
465 which was not yet paralleled by transcriptional changes, but only after several days post-  
466 conditioning (77). In turn, this stipulates that HDACi-induced epigenetic priming might become  
467 more important at later stages of memory consolidation. Alternatively, the apparent de-coupling  
468 between H3K27ac and the transcriptional changes implies that these changes also rely on other  
469 epigenetic modifications. Indeed, several studies have shown that general chromatin  
470 rearrangements, a product of combined histone post translational modifications and DNA  
471 methylation changes, are necessary for memory formation and occur soon after CFC (30, 41, 42,  
472 77–81).

473

474 Given the multifactorial physiological and molecular underpinnings of learning and memory there  
475 are several open questions emerging from this study. For example, while we only assessed  
476 histone acetylation changes in the DG, we cannot exclude the role of other hippocampal  
477 subregions, in particular CA1 (**Supplemental Fig. 4**), to be epigenetically altered by HDACi in  
478 response to CFC (67). Another limitation is the possibility that measuring mRNA and histone  
479 acetylation changes 1 hour after CFC might be more representative of secondary-wave effects of  
480 HDACi application and CFC training, considering that many IEGs, acting as transcription factors  
481 themselves, are already up-regulated 30 minutes after CFC (52, 82). Additionally, HDACi effects  
482 may reach beyond histone acetylation. For example, HDACi treatment is known to stimulate RNA  
483 polymerase II (Pol II) elongation at transcriptionally poised genes by altering PolII acetylation *in*  
484 *vitro* (83, 84). Since many IEGs associated with learning and memory have been found to be in a  
485 poised PolII state and are subsequently released in response to neuronal activation in cultures  
486 (82), this scenario warrants further investigation *in vivo* as well.

487

488 Another interesting observation is the substantial transcriptional down-regulation in response to  
489 HDACi (**Fig. 2A**), which is surprising given that HDACs are members of protein complexes  
490 involved in transcriptional silencing (85, 86). Although this phenomenon has been observed in  
491 previous studies investigating HDACi treatment alone (74) or when combined with memory  
492 extinction (15), it remains to date without definite explanation. Likewise, it remains to be  
493 determined whether similar molecular and physiological cascades are triggered by other HDACis  
494 or in conditions characterized by impaired cognition.

495

496 These open questions notwithstanding, the findings presented here shed light on the mechanisms  
497 by which systemic HDACi treatment can lead to specific memory-promoting effects. By enhancing  
498 neuronal activity-induced epigenetic and transcriptional cascades, HDACi treatment reaches a  
499 high level of target specificity despite being devoid of such specificity *per se*.

500

## 501 **Materials and Methods**

502 **Animals.** All procedures, including animal experiments, were handled according to protocols  
503 approved by Swiss animal licenses VD2808/2808.1, VD2875/2875.1, VD3169 and VD3413\_and  
504 according to the standard operating procedures of E-PHY-SCIENCE SAS (ENV/JM/MNO (2077)).



505 Ten-week-old C57BL/6J male mice were purchased from Janvier Labs and allowed an  
506 acclimatization and handling period in the EPFL animal house for two weeks before  
507 experimentation. All animals were housed in groups of 4-5 animals at 22-25° C on a 12-hour light-  
508 dark cycle with food and water ad libitum. Mice were randomly assigned a drug treatment, and  
509 experimental conditions were randomly split by cage so that all mice in one cage underwent the  
510 same fear conditioning protocol.

511

512 **Drug administration.** The class I HDAC inhibitor, CI-994 (synthesized at the Broad Institute with  
513 a purity of >95% by HPLC analysis)(15), was dissolved in 10% dimethyl sulfoxide (Sigma-Aldrich,  
514 D2438), 30% Kolliphor (Sigma-Aldrich, C5135), and 60% 0.9% saline (Braun, 395158) Its vehicle  
515 (VEH) solution consisted of all of the above, without CI-994. One hour before contextual fear  
516 conditioning, each animal was interperitoneally (i.p.) injected with either 30mg/kg of CI-994 or a  
517 corresponding volume of VEH pre-heated to 37°C on a thermomixer. Solutions were made fresh  
518 before each experiment and stored at -20°C until use.

519

520 **Contextual fear conditioning (CFC).** All behavioral testing was performed between 9AM and  
521 1PM. CFC for behavior, electrophysiology and sequencing experiments consisted of a 3 min  
522 habituation to the conditioning chamber (TSE Systems GmbH at EPFL for all molecular  
523 experiments; Imetronic (Pessac, France) for electrophysiology experiments) followed by two 1 s  
524 foot shocks (0.2mA) with an interval of 29 s and a final 15 s in the chamber. The context groups  
525 in all experiments were exposed to the conditioning chamber for the same amount of time with no  
526 shocks. The chamber was cleaned with 5% ethanol between each animal.

527 To measure the effect of CI-994 on fear learning, animals were re-exposed to the chamber for 3  
528 min, 24 h after the initial exposure. Percentage of time spent freezing over the total habituation  
529 period was automatically calculated with an infrared beam detection system (MultiConditioning  
530 System, TSE Systems GmbH). Freezing was quantified when absence of movement was  
531 detected for longer than 1 sec. Animal velocity (average cm/s) and distance travelled (total cm)  
532 during the habituation phases were calculated automatically by the TSE system. Changes in  
533 anxiety were determined by dividing the conditioning chamber into 36 sections and calculating the

534 percent of total time each animal spent in the inner 16 section (no bordering wall) of the fear  
535 conditioning chamber during the initial habituation phase.

536 For all other molecular experiments, animals were left in their home cage for 1 hour after CFC.  
537 Then animals were sacrificed and respective brain regions were manually dissected and  
538 immediately frozen on dry ice. Brain regions were stored at -80°C until further processing.

539

540 **Rotarod.** Motor performance was measured using a Rotarod apparatus (Bioseb, model LE8200).  
541 Mice were placed on the rotating rod, and the latency to fall was measured while the speed was  
542 accelerating from 4 to 40 rpm. Trials began when mice were placed on the rod and rotation began.  
543 Each trial ended, and latency was recorded, when the mouse fell off the rod. Mice were tested for  
544 4 trials with a 1 minute inter-trial interval(87).

545

546 **Electrophysiology.** One hour after CFC or Rotarod experiments mice were anesthetized with  
547 isoflurane and decapitated. Heads were immediately immersed in ice-cold freshly prepared  
548 artificial cerebrospinal fluid (aCSF; 124 mM NaCl, 1.3 mM MgSO<sub>4</sub>, 4 mM KCl, 1.0 mM Na<sub>2</sub>HPO<sub>4</sub>,  
549 2.0 mM CaCl<sub>2</sub>, 26 mM NaHCO<sub>3</sub>, and 10 mM D-glucose) for at least 2 mins before brain extraction.  
550 Acute slices (350 μm thick) were prepared with a vibratome (VT 1000S; Leica Microsystems,  
551 Bannockburn, IL) in ice-cold gassed aCSF. Sections were kept at room temperature (RT) for at  
552 least 1 h before recording.

553 For electrophysiological recordings, a single slice was placed in the recording chamber,  
554 submerged and continuously superfused with gassed (95% O<sub>2</sub>, 5% CO<sub>2</sub>) aCSF at a constant  
555 rate (2 ml/min). fEPSPs were evoked by an electrical stimulation at 0.25 Hz (100μsec duration)  
556 in the perforant path, Schaffer collaterals or the cortico-striatal pathway. Downstream extracellular  
557 fEPSPs were recorded in the Dentate Gyrus (DG), CA1 and striatum, respectively, using a glass  
558 micropipette filled with aCSF. Synaptic transmission input/output (I/O) curves were constructed  
559 at the beginning of each experiment to assess basal synaptic transmission. For the I/O, a stimulus  
560 ranging from 0 to 100 μA by 10 μA steps was applied and measured every 5 secs. Paired Pulse  
561 Facilitation (PPF) was performed to assess short-term plasticity. For PPF, two stimulations were  
562 applied and measured at 50, 100, 150, 200, 300 and 400 ms intervals. Stable baseline fEPSPs  
563 were recorded by stimulating at 30% maximal field amplitude (single stimulation (0.25 Hz) every



564 30 secs). The same intensity of stimulation was kept for the remainder of the experiment. After a  
565 10-15 min stabilization, high-frequency stimulation (HFS: 3 trains of 100-Hz stimulation, each train  
566 having a 1 sec duration and 2 trains separated by 20 sec) was delivered. Following these  
567 conditioning stimuli, a 90 min test period was recorded where responses were again elicited by a  
568 single stimulation every 30 sec at the same stimulus intensity. Signals were amplified with an  
569 Axopatch 200B amplifier (Molecular Devices, Union City, CA) digitized by a Digidata 1322A  
570 interface (Axon Instruments, Molecular Devices, US) and sampled at 10 kHz. Recordings were  
571 acquired using Clampex (Molecular Devices) and analyzed with Clampfit (Molecular Devices).  
572 Experimenters were blinded to treatment groups for all the experiments.

573 *Data Processing.* Off-line data analysis of hippocampal and striatal basal synaptic transmission  
574 and synaptic plasticity was processed using Clampfit (Molecular Devices). For I/O data, fEPSPs  
575 slopes were measured at each intensity of stimulation (from 0 to 100  $\mu$ A). These slopes were then  
576 normalized to the maximal value. Normalized fEPSP slopes were plotted against different  
577 intensities of stimulation. PPF measurements were normalized by normalizing the first fEPSP  
578 slope to 1 and comparing it with the second fEPSP slope. LTP was measured as percent of  
579 baseline fEPSP slope recorded over a 10-min period before HFS delivery. This value was taken  
580 as 100% of the excitatory post-synaptic potential slope and all recorded values were normalized  
581 to this baseline.

582  
583 **HDACi assay.** Hippocampal and striatal hemispheres, collected 1 hour after CFC consisting of  
584 three 2 sec foot shocks (0.8mA), were thawed and homogenized in RIPA buffer (150mM NaCl,  
585 50mM Tris-HCl pH8, 0.1% SDS, 0.5% deoxycolate, 1% NP-40) on ice for 30 min. Proteins were  
586 then extracted from the nuclei by adding HDAC buffer (50mM Tris-HCl pH8, 137nM NaCl; 2.7mM  
587 KCl; 1mM MgCl<sub>2</sub>; 1mg/mL BSA) and sonicating at full strength for 15 min (Diagenode, Bioruptor  
588 Plus). Protein concentration was measured using a Bradford Assay and normalized so that all  
589 assay inputs contained the same amount of protein. Pan-HDAC enzyme activity was determined  
590 using the Fluor de Lys HDAC fluorometric activity assay kit (Enzo Life Science, BML-AK500)  
591 according to the manufacturer's protocol. Protein extracts were incubated with the Fluor De Lys  
592 Substrate for 30 min and then with the Fluor De Lys Developer for 15 min. Fluorescence intensity  
593 (380nm excitation; 510 nm emission) was measured on a the Infinite M200 Pro fluorometric  
594 reader (Tecan). Mice treated with VEH and not undergoing fear conditioning were considered as

595 representing baseline HDAC activity (normalized to one-fold). Assays were run in triplicate from  
596 3 independent experiments.

597

598 **Western Blots.** Animals underwent drug administration and subthreshold CFC as described  
599 above. Full hippocampi were dissected and flash frozen 1 h after CFC. Frozen hippocampal  
600 hemispheres were cut in half and homogenized and incubated for 30 min on ice in 500 $\mu$ l RIPA  
601 buffer (150mM NaCl, 50mM Tris-HCl pH8, 0.1% SDS, 0.5% deoxycolate, 1% NP-40) with 20 $\mu$ l  
602 20x protease inhibitor (Complete mini, EDTA-free, Sigma Aldrich Cat#11836170001). Nuclei were  
603 collected by centrifugation (max speed, 20min, 4°C) and cytoplasm (supernatant) was transferred  
604 to a new tube. The nuclear pellet was mixed with 50 $\mu$ l 1x Laemmli buffer, sonicated for 10 min at  
605 full power and boiled for 10min at 90°C or until samples were no longer viscous. Protein  
606 quantifications were performed using a DC assay. For each sample, 10 $\mu$ g protein was added to  
607 SDS-PAGE gel (12.5% acrylamide in Resolving Gel and 4.5% in stacking gel) and run at 25A for  
608 ~1.5 h. Proteins were then transferred to nitrocellulose membrane for 2 h at 4°C and blocked for  
609 1 h in 5% milk in PBS-Tween20. Primary antibodies (1:2500 H4K12ac (ab46983), 1:500 H3K9ac  
610 (ab10812), and 1:5000 H3K27ac (ab4729) in 2% milk + PBS-Tween20) were incubated with the  
611 membrane overnight at 4°C (except 1:5000 total H3 (ab1791), incubated for only 30 min at RT).  
612 Then membranes were washed 3x in TBS-Tween20 and secondary antibodies (1:10,000 Goat  
613 anti-rabbit in 2% milk) for 1 h at RT. Membranes were washed and incubated with  
614 chemiluminescent ECL Plus (GE Healthcare, Cat# RPN2232SK) for 5 mins before visualization  
615 on the Fusion FX Vilber Laurmat imaging system. Due to similar sizes of histone markers, blotting  
616 was done separately and stripped between each antibody.

617 To quantify chemiluminescence, images were analyzed using “Set Measurements” in ImageJ.  
618 For each blot, percent of total luminescence was calculated for each band and normalized to the  
619 respective H3 total luminescence. Technical replicates (same samples, 2 western blots) were  
620 averaged together for each antibody and per biological replicate (6 replicates per treatment).

621

622 **RNA-seq.** *RNA extraction and library preparation.* Single frozen hippocampal and striatal  
623 hemispheres from four biological replicates were isolated after CFC. Samples were homogenized

624 and total RNA was isolated using Trizol Reagent (Life Technologies) according to the  
625 manufacturer's protocol. RNA was further purified by an on-column DNase digestion using the  
626 RNase-Free DNase Set (Qiagen, Cat# 79254) and two rounds of washes using the RNAeasy  
627 Mini Kit (Qiagen, Cat# 74106). Total RNA concentration was determined with the Nanodrop 1000  
628 (v3.8.1, Thermo Fisher).

629 Libraries were prepared using the TruSeq Stranded mRNA Preparation Kit (Illumina) starting from  
630 900ng of RNA. Libraries were quantified with the dsDNA HS Assay kit (Qubit, Cat# Q32851) and  
631 profile analysis was performed using the TapeStation (Agilent, TS4200) D500 Screen Tape  
632 System (Agilent, Cat#5067- 5588 and 5067-5589). Finally, libraries were multiplexed and  
633 sequenced across five lanes on the Illumina HiSeq 4000 (Illumina), yielding 100-bp, paired-end  
634 reads, at EPFL's gene expression core facility.

635 *RNA-seq analysis.* Truseq adapter sequences were trimmed from raw FASTQ files using  
636 bcl2fastq (v2.20.0, Illumina). STAR (v2.6)(88) was used to align FASTQ reads to the mouse  
637 mm10 reference genome with annotations downloaded from Ensembl release 93(89). A custom  
638 R script was used to count reads mapping to the exonic regions of genes and to define transcript  
639 abundance. Reads were only considered if they overlap a single gene region. Differential  
640 expression and downstream analysis were performed using DEseq2(90) and custom R scripts.  
641 Genes were considered differentially expressed if they had an adjusted p-value  $\leq 0.05$  and a  
642  $|\log_2FC| \geq 0.04$ . For the trajectory analysis, all experimental groups were compared to samples  
643 coming from animals that were treated with the VEH and context paradigm (baseline). Genes  
644 were grouped into trajectory pathways using custom-written decision tree clustering in R.

645

646 **Nuclear Extraction.** Nuclear extraction was performed for both ChIP and single nuclear  
647 sequencing experiments. All steps of nuclear extraction were done on ice. First, frozen brain  
648 tissue was homogenized in a douncer filled with 6ml Solution D (0.25M Sucrose, 25mM KCl, 5mM  
649 MgCl<sub>2</sub>, 20mM Tris-HCl, pH 7.5). For snRNA-sequencing, 5 $\mu$ g/mL actinomycin D (Sigma, Cat#  
650 A4262) was added to Solution D to block transcription induced by disassociation. Samples were  
651 centrifuged for 1 min at maximum speed and pellets were resuspended in 4ml Solution D and 2ml  
652 Optiprep (Serumwerk Bernburg). Samples were then pelleted by centrifugation for 10 min at  
653 3,200g, and the supernatant was discarded. Optiprep purification was performed a second time.

654 After the final centrifugation, pellets were resuspended and filtered into 5ml polystyrene tubes  
655 with filter (75mm) snap-caps (Corning, Cat# 352235). For the ChIP-seq experiments the final  
656 resuspension occurred in in PBS-T (0.1% Tween 20) and for snRNA-seq the final resuspension  
657 occurred in N-PBS (PBS, 5% BSA, 5 $\mu$ g/mL actinomycinD and 0.2U/ $\mu$ l RNase inhibitor (Thermo  
658 Fisher Scientific, Cat#N8080119)).

659

660 **ChIP-seq. Nuclear sorting.** ChIP-seq was performed on 3 replicates per treatment and each  
661 replicate consisted of the pooled dentate gyri from 5 mice. After nuclear extraction (see above),  
662 filtered nuclei were cross-linked by incubating with 1% formaldehyde (AppliChem, A08770) for 5  
663 min at RT. Cross-linking was quenched with 125mM glycine (VWR, 101196X) and nuclear  
664 structural quality was assessed using an EVOS FL cell imaging system (Life Technologies).

665 For each sample, approximately 750,000 nuclei were resuspended in 500 $\mu$ l PBS-T (PBS, 0.1%  
666 Tween 20). Nuclei were stained with 1:50 Alexa Fluor488 conjugated anti-NeuN antibody  
667 (Millipore, MAB377X) for 30 min. Then nuclei were spun down (1250rcf, 4°C, 5 min) and washed  
668 in PBS-T (0.1% Tween 20) twice. Finally, nuclei were resuspended and stored in 200 $\mu$ l PBS-T  
669 until sorting.

670 Flow cytometry was performed on the FACS Aria III (BD Bioscience) by the EPFL Flow Cytometry  
671 Core Facility (FCCF). Before sorting, samples were passed through a 26G needle 5 times.  
672 Hoechst (1:1000) was mixed into each sample and incubated on ice for 10 mins. Debris was first  
673 excluded by gating using forward and side scatter pulse area parameters (FSC-A and SSC-A).  
674 Multiplets were then excluded by gating FSC-H vs. FSC-W and SSC-H vs. SSC-W. Single nuclei  
675 were sorted by Hoechst intensity, elicited by 405 nm wavelength excitation and measured at 425-  
676 475nm (450/50-A). Finally, NeuN+ nuclei were sorted into ice-cold Eppendorf tubes containing  
677 100 $\mu$ l PBS-T.

678 **Chromatin immunoprecipitation (ChIP).** After sorting, nuclei were pelleted by centrifugation (4°C,  
679 1250g, 5 min) and lysed by incubating in 750 $\mu$ l RIPA buffer on ice for 10 min. Samples were  
680 sonicated on an E220 Focused-ultra-sonicator (Covaris) for 20 min (Peak power = 140W, Duty =  
681 5, Cycle/Burst = 200). Sonication efficiency was measured by decrosslinking 125 $\mu$ l of chromatin  
682 in 500 $\mu$ l of TL-Brain Buffer(10mM Tris-HCl pH7.5, 10mM EDTA 200mM NaCl), 50 $\mu$ l of 10% SDS

683 and 1 $\mu$ l of RNAseA (Thermo Fisher, Cat#EN0531) and incubating at 65°C and 650rpm overnight.  
684 10 $\mu$ l recombinant, PCR-grade Proteinase K (Roche, Cat#03115828001) was added and  
685 incubated at 45°C and 650 rpm for another hour. DNA was extracted with AcNH<sub>4</sub> (100 $\mu$ l of 10M),  
686 20 $\mu$ l glycogen (10 $\mu$ g/ $\mu$ l) and 1ml cold isopropanol and then pelleted by centrifuging at 14000rcf,  
687 4°C for 20min. DNA was further purified in 1ml 70% EtOH and centrifuged (14000rcf, 4°C, 10  
688 min). Sonicated DNA size was assessed on a 1.5% agarose gel.

689 The rest of the ChIP experiment (beginning from “Protein G Agarose Bead Preparation”) was  
690 carried out using the reagents and protocols from the Low Cell ChIP-Seq Kit (Active Motif, 53084).  
691 In brief, 400 $\mu$ l of sonicated chromatin was first cleared by incubating with pre-cleared Protein G  
692 agarose beads for 2 h on a rotator at 4°C. Half was kept as input for each sample. The other half  
693 was immunoprecipitated overnight at 4°C with 3 $\mu$ l of H3K27ac (Abcam, ab4729). After  
694 precipitation, pre-cleared Protein G agarose were added for 3 h, and both input and IP samples  
695 were washed following the kit specifications. Cross-linking was reversed by incubating samples  
696 with 5 $\mu$ l 5M NaCl and 2 $\mu$ l proteinase K at 65°C, 300rpm overnight. DNA was purified using phenol-  
697 chloroform.

698 *Library preparation.* To prepare libraries for both input and IP samples, the Next Gen DNA Library  
699 Kit (Active Motif, Cat# 53216) and Next Gen Indexing Kit (Active Motif, Cat# 53264) were used  
700 according to the manufacturer’s instructions. After adaptor ligation, fragments were amplified (1  
701 cycle, 30s at 98°C; 14 cycles, 10s at 98°C, 30s at 60°C and 60s at 68°C) and DNA was cleaned  
702 and purified using magnetic SPRI beads (Beckman Coulter, Ca# B23317). Libraries were  
703 resuspended in 25 $\mu$ l Low EDTA TE buffer and concentration was measured using a Qubit dsDNA  
704 HS Assay Kit. DNA fragments size was determined using a Fragment analyzer (NGS High  
705 Sensitivity kit (DNF-474), Agilent). Libraries were sequenced, paired-end, on the Illumina NextSeq  
706 500 at EPFL’s gene expression core facility.

707 *ChIP-seq analysis.* The Next Gen DNA Library Kit (Active Motif) includes molecular identifiers  
708 (MIDs), a 9-base random N sequence that is added with the P5 adaptor, to allow for removal of  
709 PCR duplicates from sequencing data. While R1 (75bp) contains the sequence information, R2  
710 (9 bp) contains the MID information. To conserve MID information during mapping, the MID  
711 sequence from R2 was appended to the FASTQ header in R1 using a custom R-script. Adapter  
712 sequences and low quality regions from R1 were removed using Trimmomatic (v0.38)(91) in

713 single end mode with the following parameters: ILLUMINACLIP:Y2\_adapter\_seq.fa:0:6:6  
714 SLIDINGWINDOW:10:20 MINLEN:36.

715 The processed FASTQ file (R1) was then aligned to the mm10 genome using Bowtie2 (v2.3.5)(92)  
716 in single-end mode and using default parameters. SAMtools (v1.9) (93) was used to convert SAM  
717 files to BAM format and then to sort BAM files. PCR duplicated alignments were removed from  
718 the BAM files using a perl script by Active Motif. Finally, multi-mapping and low-quality reads ( $\geq$   
719 40) were removed and BAM files were re-indexed using SAMtools.

720 Open chromatin peaks were defined using MACS2(94) in broad peak mode. Differentially  
721 acetylated regions (DARs) were identified using Diffbind (v2.16.2) (95) and DEseq2(v 1.28.1)(90)  
722 with default parameters. Peaks were considered differentially enriched if they had a false discover  
723 rate (FDR)  $\leq 0.05$  and  $|\log_2\text{FoldChange}| \geq 1$ .

724 Since H3K27ac is a marker for both promoters and enhancers, ChromHMM (v1.22)(59) was used  
725 to establish a chromatin state model that identified enhancers and promoters. The program was  
726 run, allowing for 8 states, on independently published ChIP-sequencing data (30), taken from bulk  
727 hippocampal tissue 1 h after CFC. We combined groups to get 5 chromatin states (control regions,  
728 repressed regions, promoter regions, poised enhancers and active enhancers) based on the  
729 combination of histone marks. This information was aligned with our own peak information to  
730 define differentially expressed enhancers and promoters. We assigned enhancers to genes using  
731 HOMER (v4.11) `annotatePeaks.pl` (96). Downstream trajectory analysis was performed (as described  
732 in the *RNA-sequencing Analysis* section) separately for peaks in different chromatin states.

733 All in-house analysis code can be found at [https://github.com/allie-burns/2021\\_Burns\\_etal](https://github.com/allie-burns/2021_Burns_etal).

734

735 **Single-nuclear RNA-seq. Library Preparation.** For single-nuclear RNA-sequencing (snRNA-seq)  
736 animals were treated with either VEH or HDACi and exposed to CFC. For each sample, both  
737 hippocampal hemispheres from 5 mice were pooled into two replicates each of VEH and HDACi  
738 treated groups. Nuclear extractions were performed as described. Nuclear structural quality was  
739 checked using an EVOS cell imaging system and nuclei were counted and diluted to 1,000  
740 nuclei/ $\mu\text{l}$ .



741 *Library Sequencing.* Library constructions were performed using Chromium SingleCell 3' Reagent  
742 Kit v3 chemistry (10x Genomics) according to the manufacturers protocol (CG000183 - Rev A).  
743 All 4 libraries were pooled and sequenced across 2 NextSeq 500 (v2.5) chips for 75 cycles.  
744 FASTQ files were generated using `cellranger mkfastq` (Cell Ranger v3.0.1), yielding an R1 length  
745 of 28nt and an R2 length of 56 nucleotides.

746 *snRNA-seq analysis.* To generate single cell feature counts `cellranger count` (Cell Ranger v3.0.1)  
747 was run to align FASTQ files to the mm10 pre-mRNA genome (created using `cellranger mkref`  
748 (Cell Ranger v3.0.1)) using the following settings: `expect-cells=4000`, `chemistry = SC3Pv3`, `r2-`  
749 `length = 56`. Downstream analysis was performed using custom R-scripts. Seurat (v4.0.3)(97)  
750 was used to calculate quality control metrics. `DoubletFinder`(98) was used to find and remove  
751 doublets and normalization and variance stabilization was done using `SCTransform`(99). Seurat  
752 was then used to perform UMAP and TSNE clustering, to define clusters using molecular  
753 identifiers. Differential expression analysis between VEH and HDACi treated groups was  
754 performed for each cell type using the logistic regression framework, accounting for replicates, in  
755 Seurat's `FindMarkers()` command. `Augur` (51, 100) was used with default commands to calculate  
756 perturbation prioritization for each cell type and `scProportionsTest` (101) to compute cell type  
757 composition changes between HDACi and VEH treated samples.

758

759 **KEGG pathway visualization.** The *Mus musculus* MAPK KEGG pathway (mmu04010) was  
760 downloaded from the KEGG PATHWAY Database and drawn using the Bioconductor package,  
761 Pathview (102). Differential expression of genes (or enhancers associated with genes) within this  
762 pathway are indicated by colors within each box representing a gene: The leftmost color is the  
763  $\log_2FC$  value for the active enhancers from the ChIP analysis; the middle color is the  $\log_2FC$  for  
764 the bulk RNA-seq; and the right most color is the snRNA-seq. The pathway was manually redrawn  
765 for visualization purposes and simplified by only plotting MAPK subpathways containing at least  
766 one differentially acetylated or transcribed gene.

767

768 **Statistics.** Statistical details are included in the main text and figure legends, including *P*-values,  
769 statistical tests used, 'n's for each experiment, and a description of what 'n' refers to. Biological

770 replicates refer to biological material from different mice or pools of mice and technical replicates  
771 refer to technical repetition using the same material from biological replicates.

772

### 773 **Acknowledgements**

774 We would like to thank all past and current members of the Laboratory of Neuroepigenetics at  
775 EPFL for their support and discussion throughout this project, in particular, Paola Arguello and  
776 Diego Camacho for their contribution to molecular protocols and analysis. We would also like to  
777 thank the EPFL Gene Expression Core Facility (GECF) for their technical assistance with  
778 experiment planning and sequencing, the EPFL Flow Cytometry Core Facility (FCCF) for  
779 providing the nuclear sorting and the EPFL Center of Phenogenomics (CPG) for ensuring the  
780 welfare of the laboratory animals. **Funding:** This work in the laboratory of JG is supported by the  
781 European Research Council (ERC-2015-StG 678832), the Swiss National Science Foundation  
782 (SNSF, 31003A\_155898), the National Competence Center for Research SYNAPSY (51NF40-  
783 185897) and the Flosshield and Dragon Blue Foundations.

784

### 785 **References**

- 786 1. E. R. Kandel, The molecular biology of memory storage: a dialogue between genes and  
787 synapses. *Science* **294**, 1030–8 (2001).
- 788 2. Y. S. Lee, A. J. Silva, The molecular and cellular biology of enhanced cognition. *Nat. Rev.*  
789 *Neurosci.* **10**, 126–140 (2009).
- 790 3. J. Gräff, L. H. Tsai, Histone acetylation: Molecular mnemonics on the chromatin. *Nat.*  
791 *Rev. Neurosci.* **14**, 97–111 (2013).
- 792 4. R. R. Campbell, M. A. Wood, How the epigenome integrates information and reshapes  
793 the synapse. *Nat. Rev. Neurosci.* **20**, 133–147 (2019).
- 794 5. J. M. Levenson, J. D. Sweatt, Epigenetic mechanisms in memory formation. *Nat. Rev.*  
795 *Neurosci.* **6**, 108–118 (2005).
- 796 6. J. M. Levenson, *et al.*, Regulation of histone acetylation during memory formation in the  
797 hippocampus. *J. Biol. Chem.* **279**, 40545–40559 (2004).



- 798 7. H. Villain, C. Florian, P. Roulet, HDAC inhibition promotes both initial consolidation and  
799 reconsolidation of spatial memory in mice. *Sci. Rep.* **6**, 1–9 (2016).
- 800 8. O. Bousiges, *et al.*, Spatial memory consolidation is associated with induction of several  
801 lysine-acetyltransferase (histone acetyltransferase) expression levels and H2B/H4  
802 acetylation-dependent transcriptional events in the rat hippocampus.  
803 *Neuropsychopharmacology* **35**, 2521–2537 (2010).
- 804 9. K. J. Janczura, *et al.*, Inhibition of HDAC3 reverses Alzheimer’s disease-related  
805 pathologies in vitro and in the 3xTg-AD mouse model. *Proc. Natl. Acad. Sci. U. S. A.* **115**,  
806 E11148–E11157 (2018).
- 807 10. E. Benito, *et al.*, HDAC inhibitor – dependent transcriptome and memory reinstatement in  
808 cognitive decline models. *J. Clin. Invest.* **125**, 3572–3584 (2015).
- 809 11. C. H. Volmar, *et al.*, M344 promotes nonamyloidogenic amyloid precursor protein  
810 processing while normalizing Alzheimer’s disease genes and improving memory. *Proc.*  
811 *Natl. Acad. Sci. U. S. A.* **114**, E9135–E9144 (2017).
- 812 12. S. Peleg, *et al.*, Altered Histone Acetylation Is Associated with Age-Dependent Memory  
813 Impairment in Mice. *Science* **328**, 753–756 (2010).
- 814 13. J. Gräff, *et al.*, An epigenetic blockade of cognitive functions in the neurodegenerating  
815 brain. *Nature* **483**, 222–226 (2012).
- 816 14. C. G. Vecsey, *et al.*, Histone deacetylase inhibitors enhance memory and synaptic  
817 plasticity via CREB: CBP-dependent transcriptional activation. *J. Neurosci.* **27**, 6128–  
818 6140 (2007).
- 819 15. J. Gräff, *et al.*, Epigenetic priming of memory updating during reconsolidation to attenuate  
820 remote fear memories. *Cell* **156**, 261–276 (2014).
- 821 16. A. M. Burns, J. Gräff, Cognitive epigenetic priming: leveraging histone acetylation for  
822 memory amelioration. *Curr. Opin. Neurobiol.* **67**, 75–84 (2021).
- 823 17. J. M. Scandura, *et al.*, Phase 1 study of epigenetic priming with decitabine prior to

- 824 standard induction chemotherapy for patients with AML. *Blood* **118**, 1472–1480 (2011).
- 825 18. M. Terranova-Barberio, *et al.*, HDAC inhibition potentiates immunotherapy in triple  
826 negative breast cancer. *Oncotarget* **8**, 114156–114172 (2017).
- 827 19. P. Mews, D. M. Walker, E. J. Nestler, Epigenetic priming in drug addiction. *Cold Spring*  
828 *Harb. Symp. Quant. Biol.* **83**, 131–139 (2018).
- 829 20. A. J. Robison, E. J. Nestler, Transcriptional and epigenetic mechanisms of addiction. *Nat.*  
830 *Rev. Neurosci.* **12**, 623–637 (2011).
- 831 21. R. G. Parsons, M. Davis, A metaplasticity-like mechanism supports the selection of fear  
832 memories: Role of protein kinase A in the amygdala. *J. Neurosci.* **32**, 7843–7851 (2012).
- 833 22. J. E. Bradner, *et al.*, Chemical genetic strategy identifies histone deacetylase 1 (HDAC1)  
834 and HDAC2 as therapeutic targets in sickle cell disease. *Proc. Natl. Acad. Sci. U. S. A.*  
835 **107**, 12617–12622 (2010).
- 836 23. S. Li, *et al.*, Early histone deacetylase inhibition mitigates ischemia/reperfusion brain  
837 injury by reducing microglia activation and modulating their phenotype. *Front. Neurol.* **10**,  
838 1–17 (2019).
- 839 24. N. Sada, *et al.*, Inhibition of HDAC increases BDNF expression and promotes neuronal  
840 rewiring and functional recovery after brain injury. *Cell Death Dis.* **11**, 655 (2020).
- 841 25. A. Cooper, *et al.*, Inhibition of histone deacetylation rescues phenotype in a mouse model  
842 of Birk-Barel intellectual disability syndrome. *Nat. Commun.* **11**, 1–14 (2020).
- 843 26. R. G. Phillips, J. E. LeDoux, Differential contribution of amygdala and hippocampus to  
844 cued and contextual fear conditioning. *Behav. Neurosci.* **106**, 274–285 (1992).
- 845 27. T. L. Ferreira, K. M. Moreira, D. C. Ikeda, O. F. A. Bueno, M. G. M. Oliveira, Effects of  
846 dorsal striatum lesions in tone fear conditioning and contextual fear conditioning. *Brain*  
847 *Res.* **987**, 17–24 (2003).
- 848 28. R. M. Costa, D. Cohen, M. A. L. Nicolelis, Differential Corticostriatal Plasticity during Fast  
849 and Slow Motor Skill Learning in Mice. *Curr. Biol.* **14**, 1124–1134 (2004).

- 850 29. M. Assous, *et al.*, Neuropilin 2 Signaling Mediates Corticostriatal Transmission, Spine  
851 Maintenance, and Goal-Directed Learning in Mice. *J. Neurosci.* **39**, 8845–8859 (2019).
- 852 30. R. Halder, *et al.*, DNA methylation changes in plasticity genes accompany the formation  
853 and maintenance of memory. *Nat. Neurosci.* **19**, 102–110 (2016).
- 854 31. M. A. Liz, *et al.*, A Narrative Review of the Role of Transthyretin in Health and Disease.  
855 *Neurol. Ther.* **9**, 395–402 (2020).
- 856 32. J. Brouillette, R. Quirion, Transthyretin: A key gene involved in the maintenance of  
857 memory capacities during aging. *Neurobiol. Aging* **29**, 1721–1732 (2008).
- 858 33. S. Han, *et al.*, Altered expression of synaptotagmin 13 mRNA in adult mouse brain after  
859 contextual fear conditioning. *Biochem. Biophys. Res. Commun.* **425**, 880–885 (2012).
- 860 34. S. Peng, Y. Zhang, J. Zhang, H. Wang, B. Ren, ERK in learning and memory: A review of  
861 recent research. *Int. J. Mol. Sci.* **11**, 222–232 (2010).
- 862 35. S. Davis, P. Vanhoutte, C. Pagès, J. Caboche, S. Laroche, The MAPK/ERK cascade  
863 targets both Elk-1 and cAMP response element-binding protein to control long-term  
864 potentiation-dependent gene expression in the dentate gyrus in vivo. *J. Neurosci.* **20**,  
865 4563–4572 (2000).
- 866 36. C. J. Hsu, *et al.*, AMP-activated protein kinase activation mediates CCL3-induced cell  
867 migration and matrix metalloproteinase-2 expression in human chondrosarcoma. *Cell*  
868 *Commun. Signal.* **11**, 1–15 (2013).
- 869 37. V. Dolgachev, M. Thomas, A. Berlin, N. W. Lukacs, Stem cell factor-mediated activation  
870 pathways promote murine eosinophil CCL6 production and survival. *J. Leukoc. Biol.* **81**,  
871 1111–1119 (2007).
- 872 38. H. K. Koul, M. Pal, S. Koul, Role of p38 MAP Kinase Signal Transduction in Solid  
873 Tumors. *Genes and Cancer* **4**, 342–359 (2013).
- 874 39. J. Liu, X. Wu, H. Zhang, G. P. Pfeifer, Q. Lu, Dynamics of RNA Polymerase II Pausing  
875 and Bivalent Histone H3 Methylation during Neuronal Differentiation in Brain

- 876 Development. *Cell Rep.* **20**, 1307–1318 (2017).
- 877 40. H. J. Kang, E. M. Schuman, Neurotrophin-induced modulation of synaptic transmission in  
878 the adult hippocampus. *J. Physiol. - Paris* **89**, 11–22 (1995).
- 879 41. Y. Su, *et al.*, Neuronal activity modifies the chromatin accessibility landscape in the adult  
880 brain. *Nat. Neurosci.* **20**, 476–483 (2017).
- 881 42. J. Fernandez-Albert, *et al.*, Immediate and deferred epigenomic signatures of in vivo  
882 neuronal activation in mouse hippocampus. *Nat. Neurosci.* **22**, 1718–1730 (2019).
- 883 43. J. P. Adams, J. D. Sweatt, Molecular psychology: Roles for the ERK MAP kinase  
884 cascade in memory. *Annu. Rev. Pharmacol. Toxicol.* **42**, 135–163 (2002).
- 885 44. K. A. Zalocusky, *et al.*, Neuronal ApoE upregulates MHC-I expression to drive selective  
886 neurodegeneration in Alzheimer’s disease. *Nat. Neurosci.* **24**, 786–798 (2021).
- 887 45. B. N. Jaeger, *et al.*, A novel environment-evoked transcriptional signature predicts  
888 reactivity in single dentate granule neurons. *Nat. Commun.* **9**, 3084 (2018).
- 889 46. S. Hrvatin, *et al.*, Transcriptomic States in the Mouse Visual Cortex. *Nat. Neurosci.* **21**, 1–  
890 19 (2017).
- 891 47. Y. Zhang, *et al.*, An RNA-sequencing transcriptome and splicing database of glia,  
892 neurons, and vascular cells of the cerebral cortex. *J. Neurosci.* **34**, 11929–11947 (2014).
- 893 48. E. S. Lein, *et al.*, Genome-wide atlas of gene expression in the adult mouse brain. *Nature*  
894 **445**, 168–176 (2007).
- 895 49. A. Zeisel, *et al.*, Cell types in the mouse cortex and hippocampus revealed by single-cell  
896 RNA-seq. *Science* **347**, 1138–1142 (2015).
- 897 50. C. Erö, M. O. Gewaltig, D. Keller, H. Markram, A cell atlas for the mouse brain. *Front.*  
898 *Neuroinform.* **12**, 1–16 (2018).
- 899 51. J. W. Squair, M. A. Skinnider, M. Gautier, L. J. Foster, G. Courtine, Prioritization of cell  
900 types responsive to biological perturbations in single-cell data with Augur. *Nat. Protoc.*,

- 901 1–42 (2021).
- 902 52. K. M. Tyssowski, *et al.*, Different Neuronal Activity Patterns Induce Different Gene  
903 Expression Programs. *Neuron* **98**, 530-546.e11 (2018).
- 904 53. L. F. Chen, *et al.*, Enhancer Histone Acetylation Modulates Transcriptional Bursting  
905 Dynamics of Neuronal Activity-Inducible Genes. *Cell Rep.* **26**, 1174-1188.e5 (2019).
- 906 54. A. N. Malik, *et al.*, Genome-wide identification and characterization of functional neuronal  
907 activity-dependent enhancers. *Nat. Neurosci.* **17**, 1330–1339 (2014).
- 908 55. M. P. Creighton, *et al.*, Histone H3K27ac separates active from poised enhancers and  
909 predicts developmental state. *Proc. Natl. Acad. Sci. U. S. A.* **107**, 21931–21936 (2010).
- 910 56. D. M. Coda, *et al.*, Distinct modes of SMAD2 chromatin binding and remodeling shape  
911 the transcriptional response to NODAL/Activin signaling. *Elife* **6**, 1–31 (2017).
- 912 57. H. Zhou, *et al.*, Pharmacological or transcriptional inhibition of both HDAC1 and 2 leads  
913 to cell cycle blockage and apoptosis via p21Waf1/Cip1 and p19INK4d upregulation in  
914 hepatocellular carcinoma. *Cell Prolif.* **51**, 1–14 (2018).
- 915 58. L. Jin, *et al.*, The Histone Deacetylase Inhibitor, CI994, Improves Nuclear  
916 Reprogramming and in Vitro Developmental Potential of Cloned Pig Embryos. *Cell.*  
917 *Reprogram.* **20**, 205–213 (2018).
- 918 59. J. Ernst, M. Kellis, ChromHMM: Automating chromatin-state discovery and  
919 characterization. *Nat. Methods* **9**, 215–216 (2012).
- 920 60. H. L. Hinds, I. Goussakov, K. Nakazawa, S. Tonegawa, V. Y. Bolshakov, Essential  
921 function of  $\alpha$ -calcium/calmodulin-dependent protein kinase II in neurotransmitter release  
922 at a glutamatergic central synapse. *Proc. Natl. Acad. Sci. U. S. A.* **100**, 4275–4280  
923 (2003).
- 924 61. C. H. Lin, *et al.*, The dosage of the neuroD2 transcription factor regulates amygdala  
925 development and emotional learning. *Proc. Natl. Acad. Sci. U. S. A.* **102**, 14877–14882  
926 (2005).

- 927 62. C. M. Atkins, J. C. Selcher, J. J. Petraitis, J. M. Trzaskos, J. D. Sweatt, The MAPK  
928 cascade is required for mammalian associative learning. *Nat. Neurosci.* **1**, 602–609  
929 (1998).
- 930 63. S. Blum, A. N. Moore, F. Adams, P. K. Dash, A mitogen-activated protein kinase cascade  
931 in the CA1/CA2 subfield of the dorsal hippocampus is essential for long-term spatial  
932 memory. *J. Neurosci.* **19**, 3535–3544 (1999).
- 933 64. K. Hori, *et al.*, Heterozygous disruption of autism susceptibility candidate 2 causes  
934 impaired emotional control and cognitive memory. *PLoS One* **10**, 1–13 (2015).
- 935 65. P. Y. Shih, *et al.*, Autism-linked mutations of CTTNBP2 reduce social interaction and  
936 impair dendritic spine formation via diverse mechanisms. *Acta Neuropathol. Commun.* **8**,  
937 185 (2020).
- 938 66. T. V. P. Bliss, G. L. Collingridge, A synaptic model of memory: Long-term potentiation in  
939 the hippocampus. *Nature* **361**, 31–39 (1993).
- 940 67. B. Sacchetti, *et al.*, Time-dependent inhibition of hippocampal LTP in vitro following  
941 contextual fear conditioning in the rat. *Eur. J. Neurosci.* **15**, 143–150 (2002).
- 942 68. J. R. Whitlock, A. J. Heynen, M. G. Shuler, M. F. Bear, Learning induces long-term  
943 potentiation in the hippocampus. *Science (80-. )*. **313**, 1093–1097 (2006).
- 944 69. S. Nabavi, *et al.*, Engineering a memory with LTD and LTP. *Nature* **511**, 348–352 (2014).
- 945 70. S. N. Haber, Corticostriatal circuitry. *Dialogues Clin. Neurosci.* **18**, 7–21 (2016).
- 946 71. S. Cataldi, A. T. Stanley, M. C. Miniaci, D. Sulzer, Interpreting the role of the striatum  
947 during multiple phases of motor learning. *FEBS J.* (2021).
- 948 72. P. Sütterlin, *et al.*, The molecular basis of the cooperation between EGF, FGF and eCB  
949 receptors in the regulation of neural stem cell function. *Mol. Cell. Neurosci.* **52**, 20–30  
950 (2013).
- 951 73. J. M. Revest, *et al.*, BDNF-TrkB signaling through Erk1/2MAPK phosphorylation mediates  
952 the enhancement of fear memory induced by glucocorticoids. *Mol. Psychiatry* **19**, 1001–

- 953 1009 (2014).
- 954 74. J. P. Lopez-Atalaya, S. Ito, L. M. Valor, E. Benito, A. Barco, Genomic targets, and histone  
955 acetylation and gene expression profiling of neural HDAC inhibition. *Nucleic Acids Res.*  
956 **41**, 8072–8084 (2013).
- 957 75. Z. Wang, *et al.*, Genome-wide Mapping of HATs and HDACs Reveals Distinct Functions  
958 in Active and Inactive Genes. *Cell* **138**, 1019–1031 (2009).
- 959 76. W. B. Chwang, J. S. Arthur, A. Schumacher, J. D. Sweatt, The nuclear kinase mitogen-  
960 and stress-activated protein kinase 1 regulates hippocampal chromatin remodeling in  
961 memory formation. *J. Neurosci.* **27**, 12732–12742 (2007).
- 962 77. A. Marco, *et al.*, Mapping the epigenomic and transcriptomic interplay during memory  
963 formation and recall in the hippocampal engram ensemble. *Nat. Neurosci.* **23**, 1606–1617  
964 (2020).
- 965 78. C. A. Miller, S. L. Campbell, J. D. Sweatt, DNA methylation and histone acetylation work  
966 in concert to regulate memory formation and synaptic plasticity. *Neurobiol. Learn. Mem.*  
967 **89**, 599–603 (2008).
- 968 79. S. Gupta, *et al.*, Histone methylation regulates memory formation. *J. Neurosci.* **30**, 3589–  
969 3599 (2010).
- 970 80. C. G. Duke, A. J. Kennedy, C. F. Gavin, J. J. Day, J. D. Sweatt, Experience-dependent  
971 epigenomic reorganization in the hippocampus. *Learn. Mem.* **24**, 278–288 (2017).
- 972 81. K. Pearce, D. Cai, A. C. Roberts, D. L. Glanzman, Role of protein synthesis and DNA  
973 methylation in the consolidation and maintenance of long-term memory in aplysia. *Elife* **6**,  
974 1–20 (2017).
- 975 82. R. N. Saha, *et al.*, Rapid activity-induced transcription of Arc and other IEGs relies on  
976 poised RNA polymerase II. *Nat. Neurosci.* **14**, 848–856 (2011).
- 977 83. S. Schröder, *et al.*, Acetylation of RNA Polymerase II Regulates Growth-Factor-Induced  
978 Gene Transcription in Mammalian Cells. *Mol. Cell* **52**, 314–324 (2013).



- 979 84. I. Ali, *et al.*, Crosstalk between RNA Pol II C-Terminal Domain Acetylation and  
980 Phosphorylation via RPRD Proteins. *Mol. Cell* **74**, 1164–1174 (2019).
- 981 85. J. I. Nakayama, T. Hayakawa, Physiological roles of class i HDAC complex and histone  
982 demethylase. *J. Biomed. Biotechnol.* **2011** (2011).
- 983 86. A. Hoffmann, D. Spengler, Chromatin remodeling complex NuRD in neurodevelopment  
984 and neurodevelopmental disorders. *Front. Genet.* **10** (2019).
- 985 87. M. A. Kheirbek, *et al.*, Adenylyl cyclase type 5 contributes to corticostriatal plasticity and  
986 striatum-dependent learning. *J. Neurosci.* **29**, 12115–12124 (2009).
- 987 88. A. Dobin, *et al.*, STAR: Ultrafast universal RNA-seq aligner. *Bioinformatics* **29**, 15–21  
988 (2013).
- 989 89. D. R. Zerbino, *et al.*, Ensembl 2018. *Nucleic Acids Res.* **46**, D754–D761 (2018).
- 990 90. M. I. Love, W. Huber, S. Anders, Moderated estimation of fold change and dispersion for  
991 RNA-seq data with DESeq2. *Genome Biol.* **15**, 1–21 (2014).
- 992 91. A. M. Bolger, M. Lohse, B. Usadel, Trimmomatic: A flexible trimmer for Illumina sequence  
993 data. *Bioinformatics* **30**, 2114–2120 (2014).
- 994 92. B. Langmead, S. L. Salzberg, Fast gapped-read alignment with Bowtie 2. *Nat. Methods* **9**,  
995 357–359 (2012).
- 996 93. H. Li, *et al.*, The Sequence Alignment/Map format and SAMtools. *Bioinformatics* **25**,  
997 2078–2079 (2009).
- 998 94. Y. Zhang, *et al.*, Model-based Analysis of ChIP-Seq (MACS). *Genome Biol.* **9**, R137  
999 (2008).
- 1000 95. R. Stark, G. Brown, DiffBind: differential binding analysis of ChIP-Seq peak data (2011).
- 1001 96. S. Heinz, *et al.*, Simple Combinations of Lineage-Determining Transcription Factors  
1002 Prime cis-Regulatory Elements Required for Macrophage and B Cell Identities. *Mol. Cell*  
1003 **38**, 576–589 (2010).



- 1004 97. Y. Hao, *et al.*, Integrated analysis of multimodal single-cell data. *Cell* **184**, 3573–3587  
1005 (2021).
- 1006 98. C. S. McGinnis, L. M. Murrow, Z. J. Gartner, DoubletFinder: Doublet Detection in Single-  
1007 Cell RNA Sequencing Data Using Artificial Nearest Neighbors. *Cell Syst.* **8**, 329–337  
1008 (2019).
- 1009 99. C. Hafemeister, R. Satija, Normalization and variance stabilization of single-cell RNA-seq  
1010 data using regularized negative binomial regression. *Genome Biol.* **20**, 296 (2019).
- 1011 100. M. A. Skinnider, *et al.*, Cell type prioritization in single-cell data. *Nat. Biotechnol.* **39**, 30–  
1012 34 (2021).
- 1013 101. S. A. Miller, B. Policastro, scProportionTest (2020).
- 1014 102. W. Luo, C. Brouwer, Pathview: an R / Bioconductor package for pathway-based data  
1015 integration and visualization. **29**, 1830–1831 (2013).
- 1016

### A. Experimental Schematic

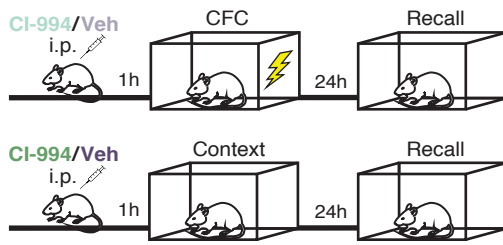

### B. Behavior

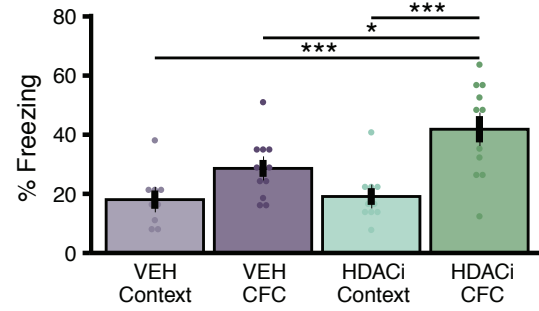

### C. LTP – Hippocampus (DG)

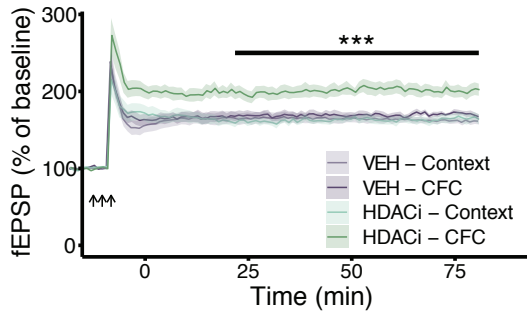

### D. LTP – Striatum

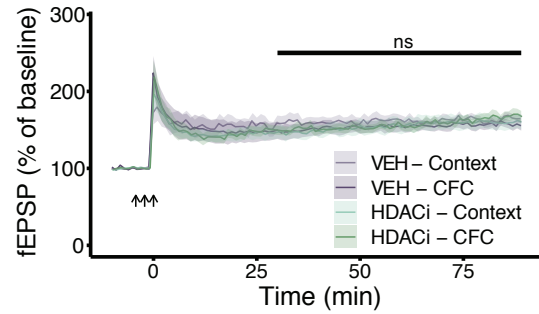

### E. HDAC activity – Hippocampus

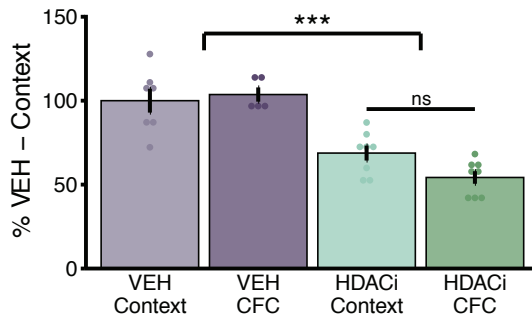

### F. HDAC activity – Striatum

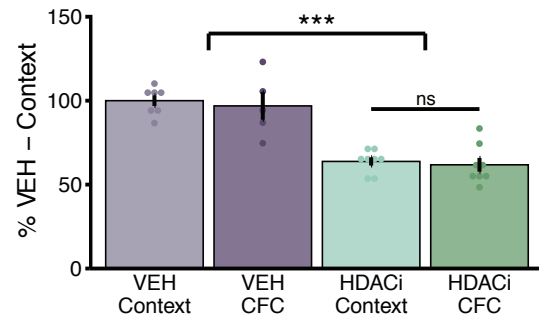

**Figure 1. HDACi treatment enhances long term potentiation in the hippocampus, but not the striatum, despite reducing HDAC activity in both brain regions.** (A) Schematic representation of the behavioral paradigm for subthreshold contextual fear conditioning (CFC) (top) and Context only exposure (bottom). All animals received an i.p. injection of either vehicle or of the HDACi, CI-994 (30mg/kg). One hour later, animals underwent sub-threshold CFC (2x 0.2mA – 1s shocks) and fear memory was measured one day later by re-exposing animals to the conditioning context in the absence of the foot shock. (B) HDACi combined with CFC increases the percent of time spent freezing (> 1s) during 3-minute re-exposure to the conditioning chamber. n = 9-12 animals/group. (C and D) HDACi combined with CFC enhances LTP in response to 3 trains of high frequency stimulation (HFS – arrows) in the perforant pathway of the dentate gyrus (C) but not in the cortical-striatal pathway (D) one hour after conditioning. Statistical differences were calculated for the 30 minutes (end of short-term-potential) to 90 minutes (end of recording) for each mouse. n = 8 animals/group. (E and F) HDAC activity was reduced after HDACi in both the hippocampus (E) and striatum (F) with no further reduction in HDAC activity in response to CFC. One or two-way ANOVA with Tukey's HSD multiple-comparisons test was used for analysis. Graphs represent mean + SEM. \*  $P < 0.05$ , \*\*  $P < 0.01$ , \*\*\*  $P < 0.001$

### A. Pair-wise differential expression – Hippocampus

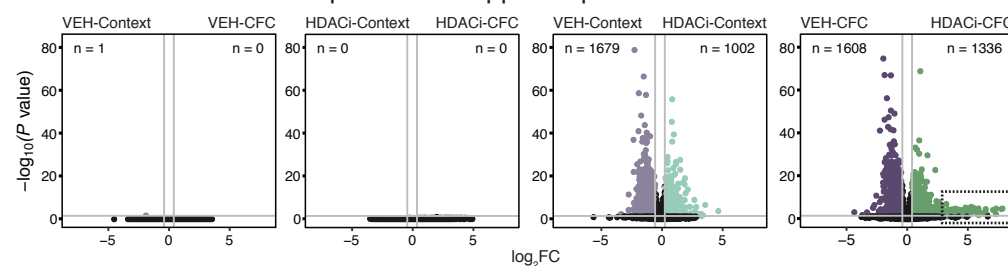

### C. Highest DEGs

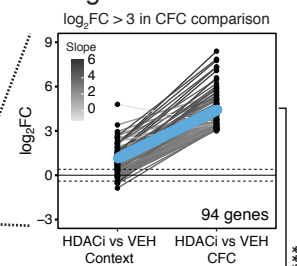

### B. Pair-wise differential expression – Striatum

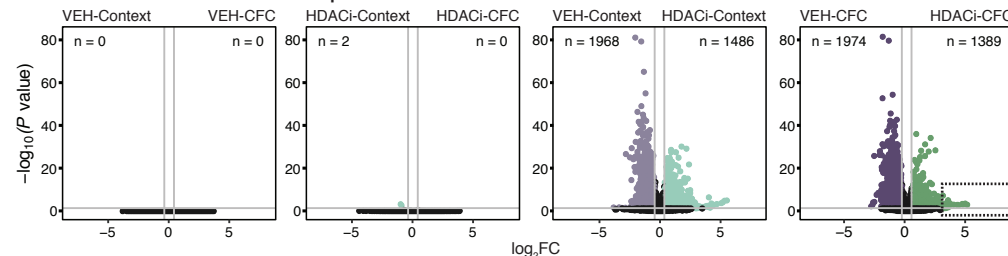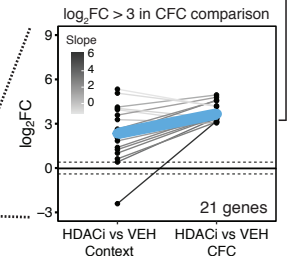

### D. Trajectory Analysis Hippocampus

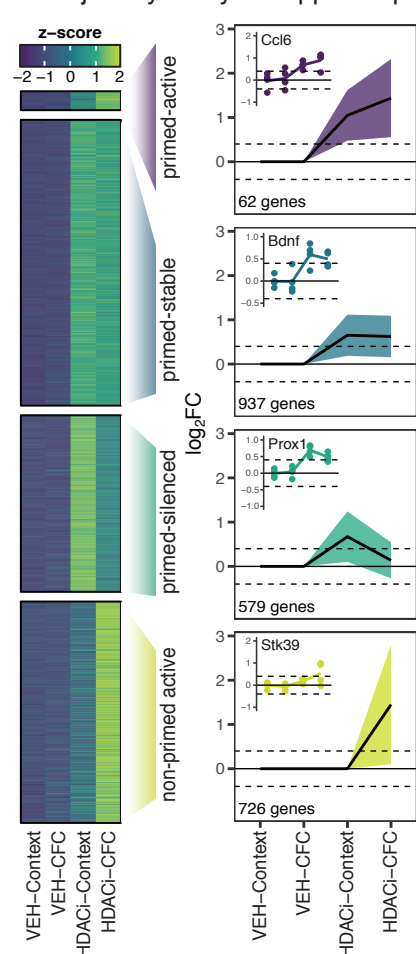

### E. GO Comparison

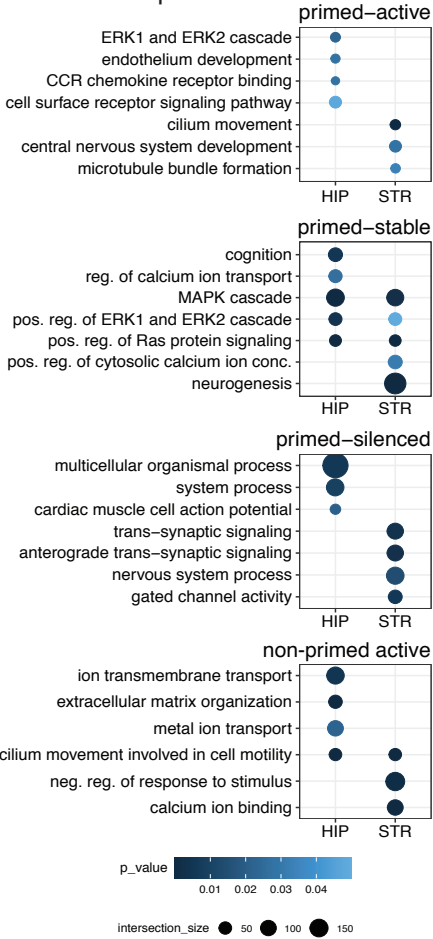

### F. Trajectory Analysis Striatum

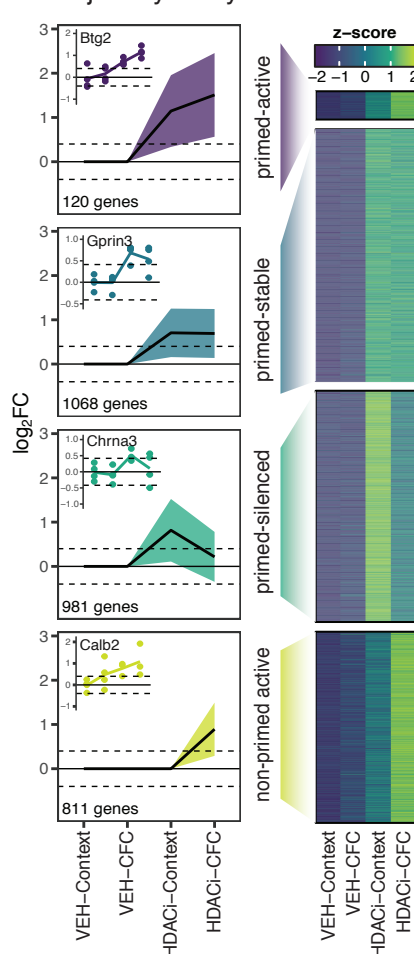

**Figure 2. HDACi activates brain region-specific transcriptional cascades in response to CFC.** (A and B) Volcano plots of magnitude of differential expression ( $\log_2FC$ ) versus statistical significance ( $-\log_{10} P$ -value) of pairwise comparisons labelled above each plot in the hippocampus (A) and striatum (B). n-values in corners represent number of DEGs ( $\log_2FC \geq 0.4$ ; adjusted  $P$ -value  $\leq 0.05$ ) in the corresponding corner label. (C) Comparisons of DEGs that have  $\geq 3 \log_2FC$  in the HDACi-CFC compared to VEH-CFC (right column) in the hippocampus (top) and striatum (bottom).  $\log_2FC$  values are plotted for those same genes in the HDACi-Context compared to VEH-Context in the left column. Lines connect the same gene in each comparison and are colored by  $\log_2FC$  difference between the two comparisons (slope). The blue line represents the average slope for each brain region. Student's t-test comparing slopes between hippocampus and striatum (right of plots). (D) Heat map of z-scores of average gene counts in the hippocampus (left). Line graphs in trajectory plots represent significant  $\log_2FC$  values for each group (right). Count in lower left corner indicates number of genes in each cluster. Line plots shown as mean  $\pm$  SEM. Insets represent DEGs from each cluster. Normalized counts for each replicate were compared to average normalized count for VEH-Context. (E) Gene ontology (GO) analysis of hippocampal (left) and striatal (right). (F) Gene cluster analysis for striatum RNA-seq data as in D. n = 4 biologically independent samples. \*  $P < 0.05$ , \*\*  $P < 0.01$ , \*\*\*  $P < 0.001$

### A. UMAP of cell types

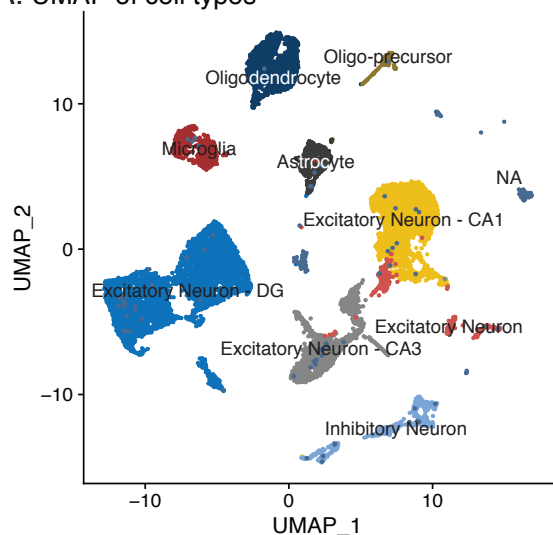

### B. DEGs by cell type

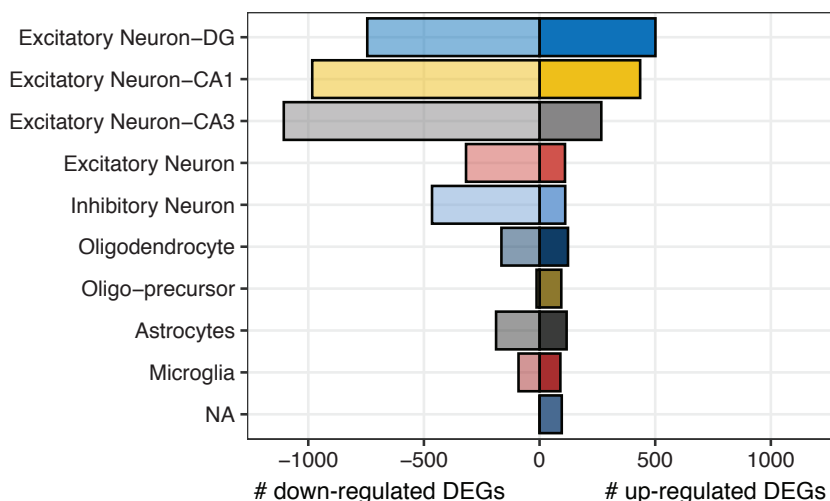

### C. Excitatory Neuron – DG

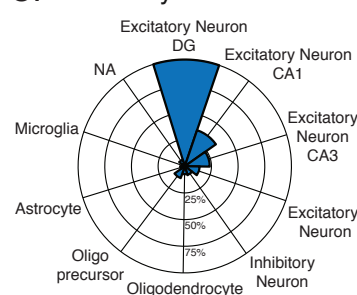

### Excitatory Neuron – CA1

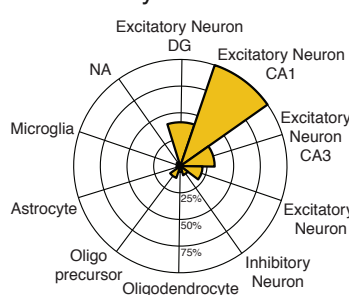

### Excitatory Neuron – CA3

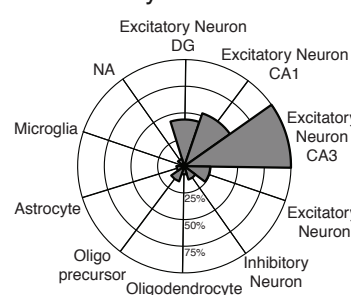

### Oligodendrocyte

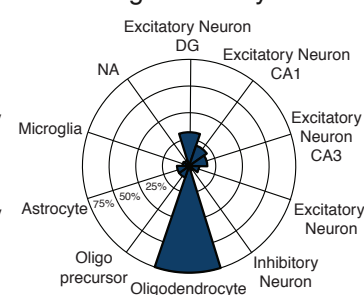

### D. UMAP – Drug Treatment

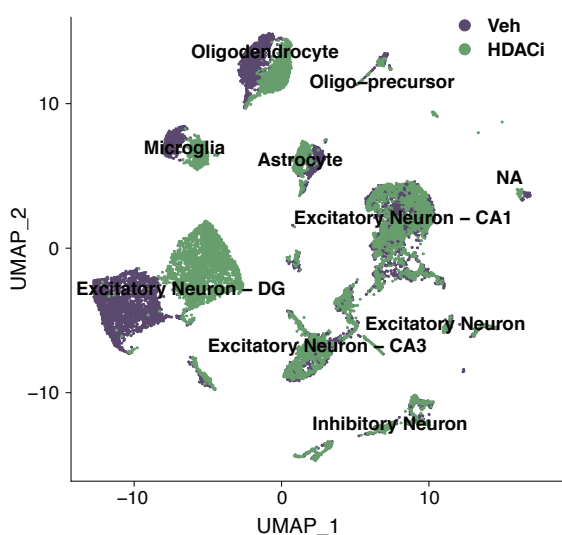

### E. Without DG Excitatory Neurons (DEGs)

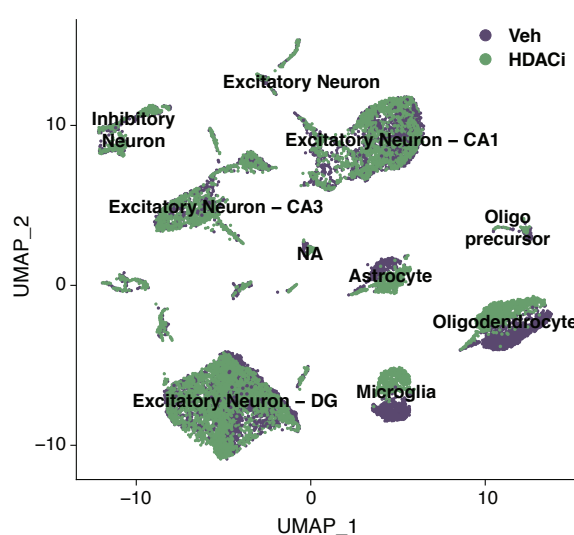

**Figure 3. HDACi activates different transcriptional cascades within hippocampal cell types.** (A) Uniform manifold approximation and projection (UMAP) visualization of 15,339 nuclei from the full hippocampus colored by 10 identified cell-types. NA refers to nuclei that could not be assigned a cell type based on expression of marker genes. (B) Number of up-regulated (right;  $\log_2FC \geq 1$ ;  $FDR \leq 0.05$ ) and down-regulated (left;  $\log_2FC \leq -1$ ;  $FDR \leq 0.05$ ) genes in each cell type when comparing HDACi-CFC to VEH-CFC. (C) Radar plots showing overlap of up-regulated genes across cell types. (Left) Percent overlap of Excitatory Neurons - DG with others. (Middle left) Percent overlap of Excitatory Neurons – CA1 with other clusters. (Middle right) Percent overlap of Excitatory Neurons – CA3 with other clusters. (Right) Percent overlap of Oligodendrocytes with other clusters. (D) UMAP visualization of nuclei from the full hippocampus colored by sample drug treatment. (E) UMAP visualization, colored by drug treatment, after removing the 501 up-regulated genes in the DG excitatory neurons and re-clustering. n = 2 biological replicates per group (HDACi-CFC and VEH-CFC).

## A. Experimental Schematic

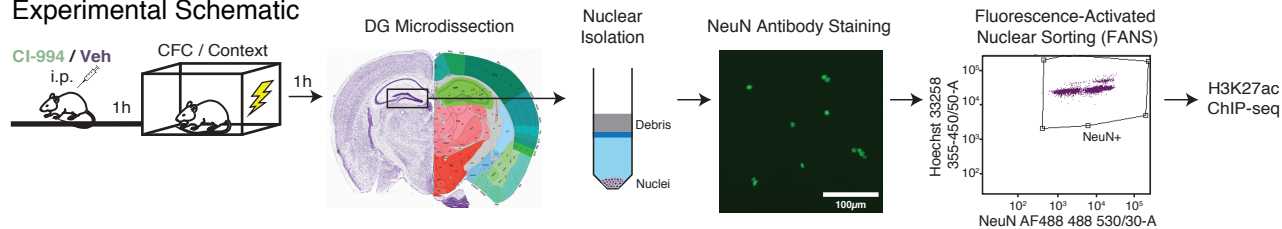

## B. Pair-wise differential expression – Hippocampus (DG neurons)

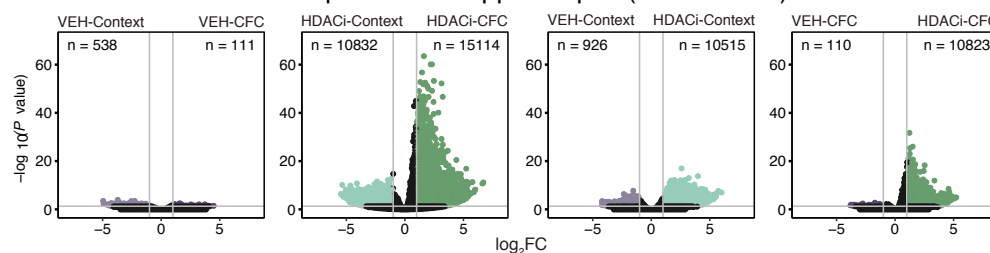

## C. Chromatin States

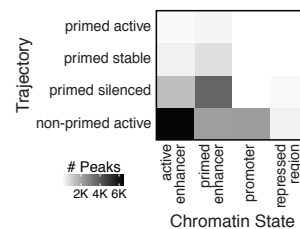

## D. Trajectory Analysis – Active enhancers

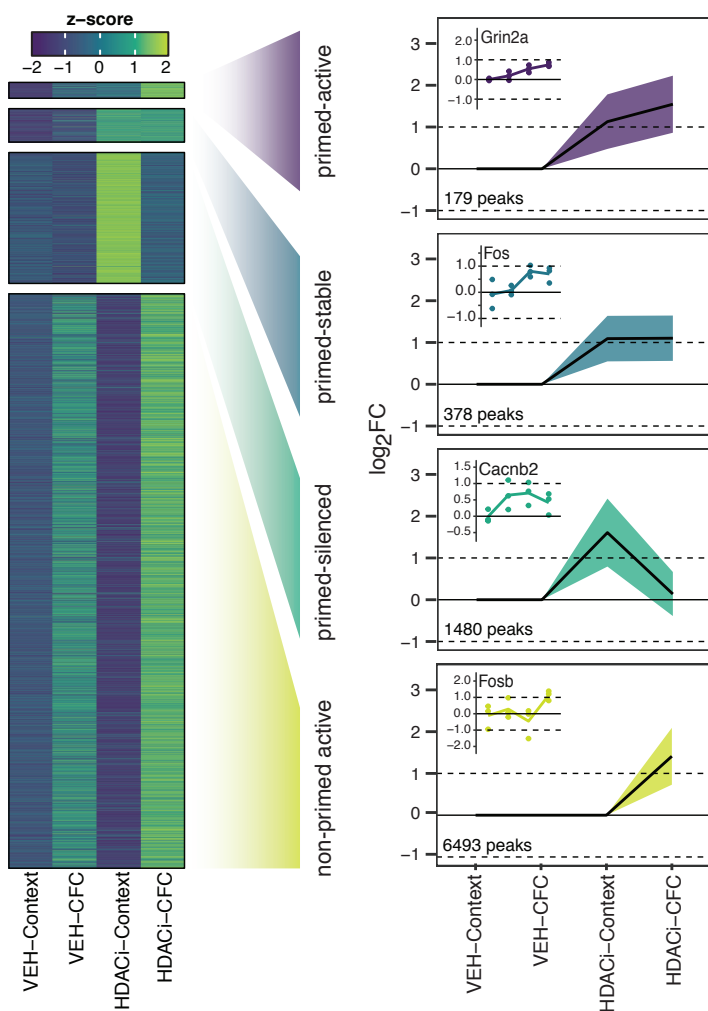

## E. GO Comparison

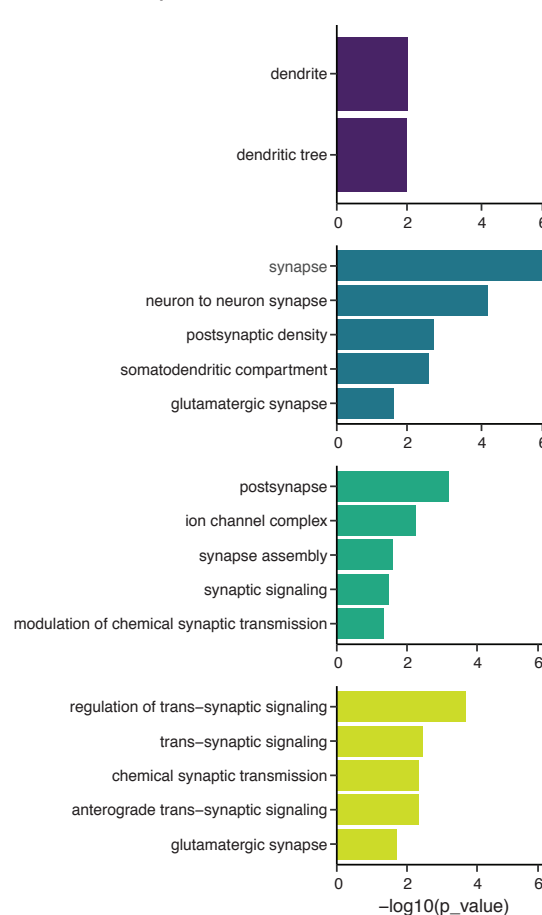

**Figure 4. HDACi enriches H3K27ac at genes involved in neuronal synaptic communication.** (A) Schematic of experimental outline. (B) Volcano plots showing the magnitude of differential H3K27ac enrichment ( $\log_2(FC)$ ) versus statistical significance ( $-\log_{10} P$ -value) for pairwise comparisons (labelled above each plot) for each peak. n-values in corners represent the number of peaks that are enriched ( $\log_2(FC) \geq 1$ ; adjusted  $P$ -value  $\leq 0.05$ ).  $P$ -values were calculated by the Wald test and corrected for multiple comparisons using FDR. (C) Heat map representing number of peaks that are in the trajectories of interest (y-axis) and in each chromatin state (x-axis). (D) Heat map of z-scores of the average normalized H3K27ac peak counts for all 4 clusters of interest. Peak sets underwent decision tree clustering based on significant  $\log_2(FC)$  values for associated peaks in each group when compared to VEH-Context. Line graphs in trajectory plots represent significant  $\log_2(FC)$  values for each group in clusters of interest. Count in lower left corner indicates number of peaks. Line plots shown as mean  $\pm$  SEM. Insets represent differentially enriched active enhancer peaks from each cluster. Normalized counts for each replicate were compared to average normalized count for VEH-Context. (E) Gene ontology (GO) analysis of genes associated with H3K27ac peaks. n = 3 biologically independent samples. \*  $P < 0.05$ , \*\*  $P < 0.01$ , \*\*\*  $P < 0.001$

### A. CHIP-RNA trajectory changes

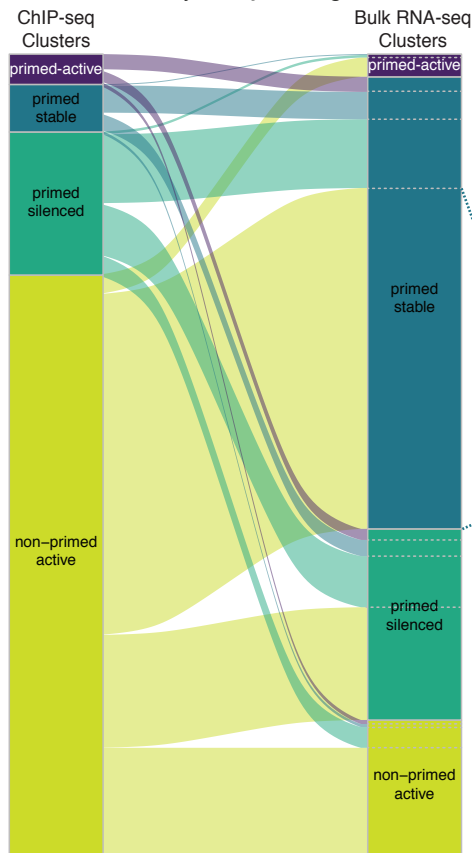

### B. Number of genes in trajectory changes

| ChIP cluster      | Bulk RNA-seq cluster | # Genes | % Changes |
|-------------------|----------------------|---------|-----------|
| primed - active   | primed - active      | 0       | 0         |
|                   | primed - stable      | 30      | 3         |
|                   | primed - silenced    | 22      | 2         |
|                   | non-primed active    | 8       | 1         |
| primed - stable   | primed - active      | 2       | 0         |
|                   | primed - stable      | 54      | 5         |
|                   | primed - silenced    | 32      | 3         |
|                   | non-primed active    | 6       | 1         |
| primed - silenced | primed - active      | 5       | 0         |
|                   | primed - stable      | 136     | 12        |
|                   | primed - silenced    | 101     | 9         |
|                   | non-primed active    | 41      | 4         |
| non-primed active | primed - active      | 38      | 3         |
|                   | primed - stable      | 674     | 58        |
|                   | primed - silenced    | 223     | 19        |
|                   | non-primed active    | 213     | 19        |

### C. Non-primed active (ChIP) to primed-stable (RNA)

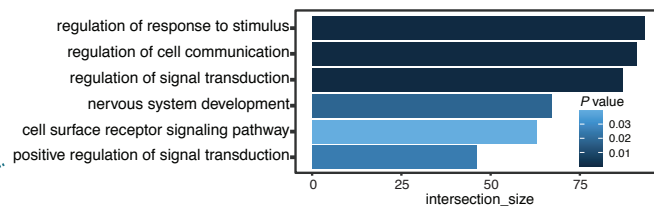

### D. IGV Snapshot - Jun

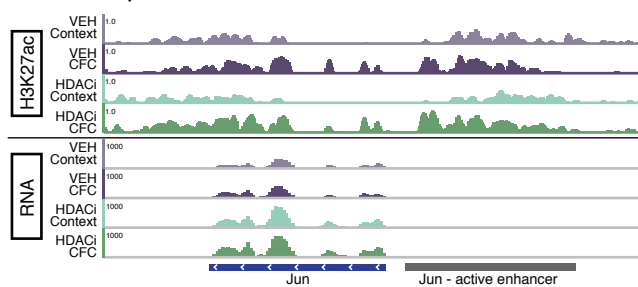

### E. MAPK Signaling Pathway

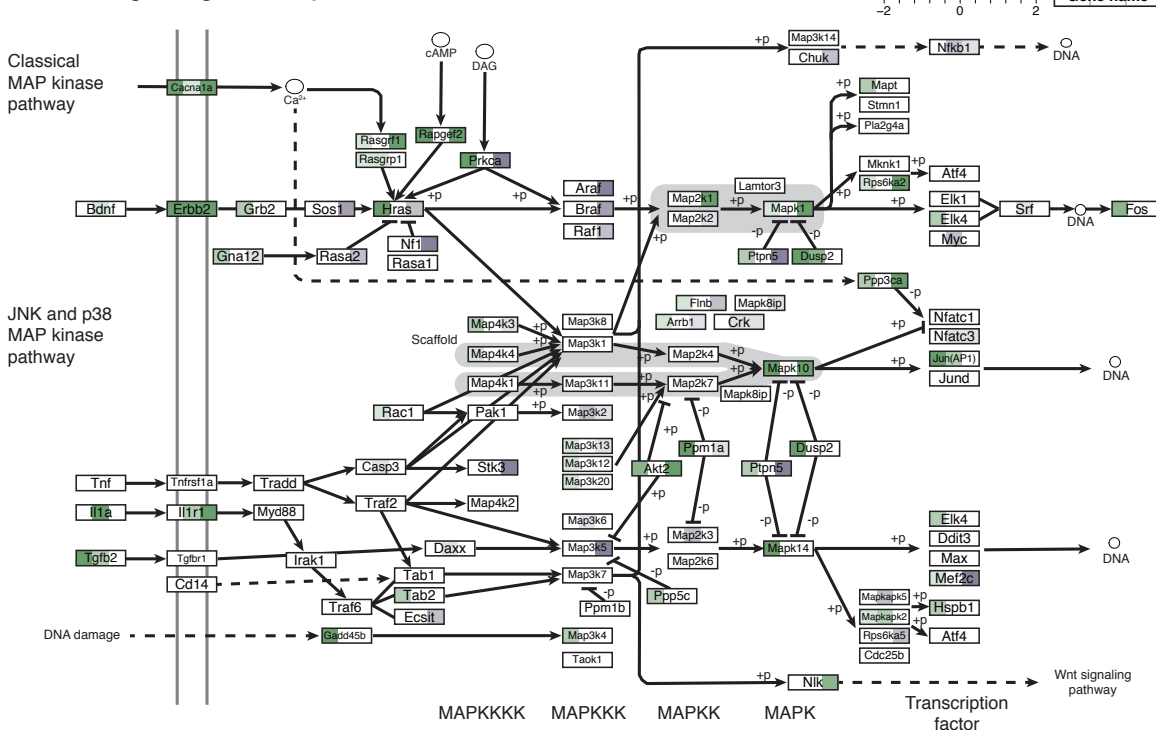

**Figure 5. Overlap between HDACi-induced acetylation and transcriptional changes.** (A) Sankey plot showing the change in trajectory association for the 1585 active-enhancer associated genes present in both the ChIP (left) and bulk RNA-seq (right) and in the trajectory clusters of interest. (B) Number of genes changing between the ChIP-seq clusters and the bulk RNA-seq clusters. (C) Gene ontologies for the 674 genes in the ChIP non-primed active cluster shifted to the RNA-seq primed-stable cluster. (D) Example genome track of the H3K27ac (top 4 tracks) and mRNA expression (bottom 4 tracks) for Jun. Jun's active enhancer is labelled in grey and the Jun gene is labelled in blue. (E) MAPK signaling KEGG pathway visualization. Colors in each box represent significant  $\log_2FC$  values for the HDAC-CFC compared to the VEH-CFC comparison in the ChIP (left color), bulk RNA (middle color) and snRNA-sequencing (right color).
